# Supplementary material
Source: Research Square preprint supplement (doi:10.21203/rs.3.rs-10089806/v1)
Supplement: Supplementary file 1 [file 0054e615a92a248102d6d7a0.xlsx]

## Sheet: SSA_Panel
country	iso3	year	uhc_sci	oop_che	gghe_gdp	external_che	gov_effectiveness	gdp_pc	physicians_1000	conflict_events	latent_hsi
Angola	AGO	2000	21	27.3047	0.980978	0.513654	-1.11412	780.891		305	43.664
Angola	AGO	2001		45.0911	1.80684	1.4306		739.132		301	49.004
Angola	AGO	2002		49.6621	1.15548	1.27742	-1.23009	999.066		22	49.291
Angola	AGO	2003		48.5107	1.28336	1.03923	-1.4582	1133.66		2	53.071
Angola	AGO	2004		46.8911	1.47136	1.92935	-1.53168	1451.47	0.063	5	52.785
Angola	AGO	2005	24	42.3327	1.14205	3.03783	-1.54121	2145.89		2	50.218
Angola	AGO	2006		30.6657	1.28968	5.85646	-1.49247	2930.44		3	58.026
Angola	AGO	2007		28.384	1.53876	2.69764	-1.41302	3515.06		13	58.365
Angola	AGO	2008		21.6532	1.91652	2.4888	-1.32382	4578.16		10	62.473
Angola	AGO	2009		15.5089	2.23769	3.82744	-1.09744	3645.15	0.132	11	64.446
Angola	AGO	2010	31	19.3438	1.46827	3.24645	-0.951501	4101.64		8	58.93
Angola	AGO	2011		17.9938	1.52543	2.86123	-1.00977	5184.15		8	64.512
Angola	AGO	2012		17.6192	1.39434	2.17543	-1.0192	5702.45		5	65.447
Angola	AGO	2013		21.3493	1.50718	2.56596	-1.02863	5876.46		10	63.783
Angola	AGO	2014		26.8762	1.16798	3.17015	-0.940011	6054.63		3	64.174
Angola	AGO	2015	36	33.5232	1.08924	2.67032	-0.937824	4675.83		5	57.984
Angola	AGO	2016		35.2089	1.05521	3.64164	-0.949385	3932.54		31	56.677
Angola	AGO	2017	40	34.121	1.12825	3.11479	-0.968116	4624.95	0.212	54	54.976
Angola	AGO	2018		36.2473	0.979819	3.63669	-0.97846	3648.55	0.211	27	56.148
Angola	AGO	2019	39	33.1431	1.00304	3.9593	-0.911696	2924.15		19	55.124
Angola	AGO	2020		28.6222	1.46055	5.42787	-1.01636	1988.59		65	54.693
Angola	AGO	2021	37	26.1173	1.51677	4.63837	-0.934701	2443.36		64	54.328
Angola	AGO	2022		30.0386	1.30712	4.6001	-0.832572	3997.26	0.244	67	57.333
Angola	AGO	2023		32.5467	1.13403	7.16891	-0.828703	2986.78		66	54.95
Angola	AGO	2024					-0.785191			42
Benin	BEN	2000	21	54.9102	1.13418	2.57864	-0.795679	487.424		0	48.298
Benin	BEN	2001		49.0554	1.20063	11.2712		492.401		3	52.084
Benin	BEN	2002		51.7661	0.937145	14.4336	-0.635705	546.464		0	52.536
Benin	BEN	2003		51.6753	1.05234	10.9974	-0.64495	676.003		1	52.889
Benin	BEN	2004		48.582	1.15381	12.2456	-0.446304	758.696	0.038	1	54.866
Benin	BEN	2005	22	46.5253	1.04785	17.5047	-0.613399	779.438		0	49.154
Benin	BEN	2006		45.665	1.06307	18.6066	-0.693145	809.147		0	54.183
Benin	BEN	2007		48.2783	0.954819	15.4243	-0.604119	912.338		3	52.241
Benin	BEN	2008		44	0.74251	23.9999	-0.53276	1060.6	0.059	0	54.254
Benin	BEN	2009		42.4428	0.867846	24.7916	-0.461249	1024.1		1	53.626
Benin	BEN	2010	33	43.3903	0.752295	29.6504	-0.482139	973.244	0.052	1	49.349
Benin	BEN	2011		44.4867	0.6515	32.4402	-0.446753	1059.41	0.054	3	49.903
Benin	BEN	2012		41.5277	0.746865	28.6069	-0.501416	1071.53		1	52.645
Benin	BEN	2013		42.5843	0.76463	25.0217	-0.519836	1168.93		1	53.43
Benin	BEN	2014		46.494	0.575325	25.1275	-0.447104	1204.4		1	52.608
Benin	BEN	2015	35	51.4056	0.590826	19.7697	-0.54104	1002.42		3	48.558
Benin	BEN	2016		49.5562	0.713892	26.3265	-0.494807	1010.53	0.045	9	48.187
Benin	BEN	2017	34	47.9788	0.706373	28.1572	-0.46663	1054.97		9	46.6
Benin	BEN	2018		49.2225	0.666735	26.4254	-0.362429	1150.82	0.073	25	47.367
Benin	BEN	2019	35	54.7011	0.456258	24.552	-0.313374	1130.74	0.06	21	45.339
Benin	BEN	2020		53.5111	0.511221	24.297	-0.188794	1200.19		119	44.639
Benin	BEN	2021	38	55.365	0.333741	27.545	-0.201889	1318.65	0.205	102	43.456
Benin	BEN	2022		49.1142	0.507207	28.7171	-0.214913	1266.43	0.19	177	43.864
Benin	BEN	2023		42.4053	0.489489	38.4243	-0.216368	1394.18	0.216	290	42.472
Benin	BEN	2024					-0.185421			282
Botswana	BWA	2000	35	10.6719	3.25406	16.0445	0.232181	3387.66	0.298	0	70.935
Botswana	BWA	2001		9.45569	3.50531	14.0044		3188.97	0.298	0	78.334
Botswana	BWA	2002		8.74495	3.76325	13.2728	0.444301	3092.34	0.307	0	79.514
Botswana	BWA	2003		8.76611	3.60058	12.6718	0.623824	4206.14	0.296	0	81.129
Botswana	BWA	2004		8.58329	3.43439	11.2911	0.509206	4879.96	0.396	2	78.852
Botswana	BWA	2005	48	8.49858	2.86617	11.4869	0.593222	5344.17	0.253	1	75.891
Botswana	BWA	2006		8.29257	2.7911	10.6962	0.362322	5291.61	0.315	0	79.072
Botswana	BWA	2007		6.77262	3.12949	14.9963	0.566794	5528.55	0.371	1	79.14
Botswana	BWA	2008		5.81574	3.66806	12.5266	0.522734	5503.08	0.367	1	80.964
Botswana	BWA	2009		5.42353	3.41018	7.35744	0.562841	5082.93	0.348	1	81.441
Botswana	BWA	2010	54	4.99356	3.60706	5.10272	0.531226	6215.74	0.403	1	80.737
Botswana	BWA	2011		4.57396	3.60457	4.83636	0.543164	7287.38	0.395	1	83.707
Botswana	BWA	2012		4.24005	4.09602	4.60987	0.552509	6595.52	0.388	0	86.097
Botswana	BWA	2013		3.78434	4.15482	8.83758	0.547686	6666.91		1	84.119
Botswana	BWA	2014		3.7171	3.99039	7.95072	0.518087	7122.37		1	83.979
Botswana	BWA	2015	58	3.57782	4.13518	7.03001	0.569434	6141.21		1	82.78
Botswana	BWA	2016		3.30749	3.83727	5.66544	0.53616	6749.05	0.371	2	83.304
Botswana	BWA	2017	58	2.99324	5.01613	9.61173	0.415617	7104.97		2	83.374
Botswana	BWA	2018		5.10579	4.14253	8.53516	0.346778	7407.94	0.402	3	81.899
Botswana	BWA	2019	55	4.49591	4.37294	9.56365	0.403339	7159.27	0.395	1	81.716
Botswana	BWA	2020		4.95155	4.48995	5.72427	0.310377	6310.52	0.433	12	80.43
Botswana	BWA	2021	55	4.26548	4.8283	5.36596	0.402563	7807.89	0.422	6	81.673
Botswana	BWA	2022		4.3919	4.30745	6.34106	0.459372	8328.7	0.407	7	82.534
Botswana	BWA	2023		4.25866	4.72067	6.53434	0.540996	7826.35	0.379	13	82.681
Botswana	BWA	2024					0.416889			3
Burkina Faso	BFA	2000	15	57.5638	0.961293	15.6255	-0.973968	248.909		3	38.84
Burkina Faso	BFA	2001		58.2261	0.97162	14.2932		259.485	0.04	2	46.571
Burkina Faso	BFA	2002		56.1251	1.05799	15.7763	-1.08263	285.654		5	43.899
Burkina Faso	BFA	2003		52.6598	0.980187	22.5584	-1.08932	362.374		1	45.809
Burkina Faso	BFA	2004		43.9183	1.69978	21.5215	-0.783567	403.813	0.052	3	50.13
Burkina Faso	BFA	2005	21	43.4124	1.22285	28.903	-0.742313	441.164		0	45.626
Burkina Faso	BFA	2006		39.6253	1.43098	30.9123	-0.834212	455.514		6	47.397
Burkina Faso	BFA	2007		34.2026	1.43213	39.0233	-0.728437	514.684		0	51.423
Burkina Faso	BFA	2008		35.3967	1.36111	34.3147	-0.58808	619.438	0.031	6	49.579
Burkina Faso	BFA	2009		32.9611	1.64178	30.2923	-0.550792	601.57	0.043	0	55.444
Burkina Faso	BFA	2010	30	30.83	1.30631	41.0318	-0.518394	624.957	0.044	0	49.705
Burkina Faso	BFA	2011		32.8817	1.3462	32.625	-0.527982	725.025	0.037	13	49.891
Burkina Faso	BFA	2012		32.3836	1.0645	38.2105	-0.619141	731.47	0.046	13	47.677
Burkina Faso	BFA	2013		33.5373	1.61237	29.5111	-0.6252	759.762	0.045	8	51.598
Burkina Faso	BFA	2014		34.0785	1.62685	23.6043	-0.562728	764.862	0.047	22	51.316
Burkina Faso	BFA	2015	35	36.0298	1.45619	24.6708	-0.653111	630.125	0.063	22	47.519
Burkina Faso	BFA	2016		31.3937	2.38693	23.4507	-0.524935	663.715	0.062	41	52.354
Burkina Faso	BFA	2017	38	31.3615	2.68795	17.7698	-0.510937	708.7	0.082	97	51.436
Burkina Faso	BFA	2018		36.2312	2.12524	14.191	-0.482296	778.389	0.082	233	50.135
Burkina Faso	BFA	2019	38	34.678	2.23603	15.7911	-0.627609	767.642	0.091	634	46.913
Burkina Faso	BFA	2020		38.5571	2.84514	16.6224	-0.63089	829.273	0.096	666	48.4
Burkina Faso	BFA	2021	40	41.1914	2.73058	16.2734	-0.746448	897.311	0.101	1339	45.903
Burkina Faso	BFA	2022		42.2925	2.6287	18.3873	-0.871408	868.361	0.148	1652	43.945
Burkina Faso	BFA	2023		43.822	2.4525	20.9231	-0.864281	919.741		1716	42.809
Burkina Faso	BFA	2024					-0.874867			1318
Burundi	BDI	2000	19	61.1388	1.46507	1.03791	-1.82829	134.522	0.052	484	29.598
Burundi	BDI	2001		45.4336	1.69244	22.4603		132.144		601	34.904
Burundi	BDI	2002		49.8433	1.5355	18.9477	-1.94451	120.938		434	30.374
Burundi	BDI	2003		50.2501	1.35508	21.5139	-1.95375	111.393		217	30.308
Burundi	BDI	2004		38.5936	2.36819	26.1131	-1.52823	125.181	0.027	75	38.723
Burundi	BDI	2005	24	39.1872	2.06248	31.6491	-1.36942	147.235		71	35.549
Burundi	BDI	2006		39.7279	2.36401	31.3463	-1.33965	161.893		106	38.493
Burundi	BDI	2007		41.1309	2.46383	30.2501	-1.35846	166.163		28	41.185
Burundi	BDI	2008		42.8971	1.55914	35.0463	-1.25128	189.502		77	36.623
Burundi	BDI	2009		35.457	2.0808	40.4819	-1.09104	198.432		67	39.477
Burundi	BDI	2010	33	28.1864	1.98529	53.0108	-1.20062	216.728	0.045	95	36.728
Burundi	BDI	2011		25.4752	3.47108	38.2709	-1.16114	230.071	0.037	25	47.395
Burundi	BDI	2012		22.4023	2.66949	44.3091	-1.18692	231.685	0.049	13	45.815
Burundi	BDI	2013		20.8619	1.54087	59.3154	-0.897294	234.845	0.053	10	42.075
Burundi	BDI	2014		31.0011	2.7868	28.02	-0.875808	250.54	0.056	55	46.986
Burundi	BDI	2015	40	31.2085	2.41954	28.0001	-0.925703	281.002	0.046	970	41.35
Burundi	BDI	2016		28.3675	2.23588	37.9049	-1.07213	263.326		875	37.955
Burundi	BDI	2017	40	28.9985	2.01362	39.9368	-0.921758	275.689	0.094	703	39.182
Burundi	BDI	2018		27.1157	2.05752	43.0656	-1.02936	256.077	0.094	810	36.936
Burundi	BDI	2019	42	22.2172	2.27764	51.3284	-0.976619	245.53		663	38.826
Burundi	BDI	2020		20.4573	2.15696	56.5872	-1.09344	244.863	0.069	545	35.944
Burundi	BDI	2021	41	24.2893	2.22448	47.4884	-1.12423	258.493	0.076	562	38.615
Burundi	BDI	2022		25.176	1.58513	53.0753	-1.18099	294.408	0.078	366	35.241
Burundi	BDI	2023		24.4898	1.34037	57.4204	-1.10827	309.414		274	34.923
Burundi	BDI	2024					-1.00609			294
Cabo Verde	CPV	2000	43	25.2592	2.75231	2.57254		1542.39			62.342
Cabo Verde	CPV	2001		23.3311	2.69891	2.83517		1719.39			66.257
Cabo Verde	CPV	2002		23.5238	2.71163	2.85524	-0.302043	1855.68			64.899
Cabo Verde	CPV	2003		24.1724	2.66076	1.62362	-0.314431	2333.96			65.726
Cabo Verde	CPV	2004		23.834	2.53043	3.9293	-0.354132	2634.74	0.493		65.066
Cabo Verde	CPV	2005	54	24.5908	2.30861	5.41884	-0.222242	2876.18			65.341
Cabo Verde	CPV	2006		23.7996	2.53359	9.10694	0.138406	2958.39			67.162
Cabo Verde	CPV	2007		22.9162	2.73045	5.20043	0.290806	3324.57			70.328
Cabo Verde	CPV	2008		24.4498	2.238	6.1129	0.181238	3908.65			68.23
Cabo Verde	CPV	2009		24.2222	2.54577	3.1269	0.180889	3659.71	0.136		69.707
Cabo Verde	CPV	2010	63	28.0835	2.58053	5.98387	0.107822	3579.46	0.573		69.896
Cabo Verde	CPV	2011		25.8896	2.6118	4.71763	0.131109	4002.01	0.571		69.147
Cabo Verde	CPV	2012		24.5682	2.79963	12.9991	0.111757	3736.81	0.508		67.532
Cabo Verde	CPV	2013		24.2501	2.78713	15.2737	0.07416	3960.98	0.601		66.994
Cabo Verde	CPV	2014		25.6991	2.77216	15.063	0.192347	3985.62	0.461		67.384
Cabo Verde	CPV	2015	68	27.7349	2.89665	4.15416	0.323293	3415.07	0.743		73.366
Cabo Verde	CPV	2016		28.6661	2.76935	5.18158	0.289829	3608.96	0.731		69.374
Cabo Verde	CPV	2017	70	34.1209	2.55317	2.81057	0.319413	3893.03	0.659		72.437
Cabo Verde	CPV	2018		27.0654	3.10239	2.63669	0.345416	4294.96	0.711		72.418
Cabo Verde	CPV	2019	69	24.9411	3.24034	2.533	0.383949	4378.85	0.743		76.501
Cabo Verde	CPV	2020		24.1244	4.64177	6.03675	0.394994	3550.19	0.725	4	77.261
Cabo Verde	CPV	2021	71	23.0095	4.58503	3.42638	0.277459	3971.45	0.732	1	81.479
Cabo Verde	CPV	2022		22.0694	4.1678	11.6936	0.360012	4432.45	0.718	3	76.268
Cabo Verde	CPV	2023		25.7399	3.42532	10.9955	0.361672	4961.19	0.73	2	74.754
Cabo Verde	CPV	2024					0.415195			1
Cameroon	CMR	2000	22	78.474	0.645108	2.55206	-1.05161	708.566		4	40.719
Cameroon	CMR	2001		75.1047	0.780282	2.09439		715.47		2	48.993
Cameroon	CMR	2002		70.1814	0.891755	3.44703	-1.20502	789.624		1	48.08
Cameroon	CMR	2003		71.5159	0.857672	2.36825	-1.28593	988.241		4	46.526
Cameroon	CMR	2004		73.892	0.705535	3.34895	-1.04884	1133.39	0.188	4	47.088
Cameroon	CMR	2005	28	74.3388	0.652087	4.76077	-1.07998	1142.62	0.061	16	41.586
Cameroon	CMR	2006		74.3581	0.648104	4.6556	-1.08449	1191.45		5	46.209
Cameroon	CMR	2007		75.5684	0.56893	5.04734	-0.95458	1325.67	0.073	18	44.47
Cameroon	CMR	2008		74.2456	0.55072	6.10976	-0.894691	1492.14		14	45.602
Cameroon	CMR	2009		76.7654	0.448008	5.71516	-0.829283	1461.39	0.07	14	45.181
Cameroon	CMR	2010	33	76.0214	0.406355	8.00397	-0.819052	1398.59	0.087	10	43.691
Cameroon	CMR	2011		69.6496	0.572956	12.1564	-0.84217	1513.96	0.091	11	46.035
Cameroon	CMR	2012		66.8448	0.640088	7.86002	-0.832618	1449.1		4	49.264
Cameroon	CMR	2013		69.7194	0.480381	7.30821	-0.795054	1575.93		25	45.704
Cameroon	CMR	2014		68.9847	0.589774	9.25202	-0.575135	1649.44		104	44.281
Cameroon	CMR	2015	42	73.833	0.363836	8.63537	-0.626723	1415		104	43.019
Cameroon	CMR	2016		73.3875	0.365931	8.78061	-0.612498	1441.72		237	40.744
Cameroon	CMR	2017	43	78.462	0.141208	8.49681	-0.6251	1496.09		341	40.216
Cameroon	CMR	2018		72.2617	0.351338	14.2901	-0.678021	1611.43	0.131	682	37.778
Cameroon	CMR	2019	43	72.1888	0.406872	13.0471	-0.737968	1555.35		718	39.442
Cameroon	CMR	2020		71.8768	0.606754	10.7126	-0.827141	1556.79	0.098	1172	37.36
Cameroon	CMR	2021	44	70.6405	0.488822	15.0182	-0.787711	1672.33	0.126	1173	38.933
Cameroon	CMR	2022		67.7539	0.668332	14.419	-0.784345	1604.88	0.136	1609	37.261
Cameroon	CMR	2023		67.6512	0.669234	14.7056	-0.778702	1736.72		2745	36.485
Cameroon	CMR	2024					-0.800789			3162
Central African Republic	CAF	2000	18	48.2781	1.72009	11.3576	-1.31199	226.267		6	40.88
Central African Republic	CAF	2001		54.1029	1.5168	6.85738		229.649		35	44.901
Central African Republic	CAF	2002		49.5978	1.43424	15.413	-1.72749	246.471		54	38.286
Central African Republic	CAF	2003		49.0658	1.54274	12.9437	-1.73673	290.272		59	39.508
Central African Republic	CAF	2004		53.1308	1.4744	10.0986	-1.65582	312.961	0.079	20	41.785
Central African Republic	CAF	2005	19	51.7197	1.03555	22.6303	-1.7556	329.548		16	34.69
Central African Republic	CAF	2006		51.5476	1.22708	18.8405	-1.67014	351.534		48	38.312
Central African Republic	CAF	2007		49.7078	1.27106	21.7725	-1.63273	393.758		94	37.456
Central African Republic	CAF	2008		57.9725	0.846768	19.7329	-1.63327	447.772	0.0405	82	35.842
Central African Republic	CAF	2009		47.844	0.732013	35.3468	-1.52464	456.472	0.045	95	34.603
Central African Republic	CAF	2010	26	59.5203	0.576718	22.9101	-1.40942	476.874		156	32.733
Central African Republic	CAF	2011		58.584	0.41519	28.8808	-1.40419	534.057		54	35.204
Central African Republic	CAF	2012		58.081	0.622622	24.9796	-1.42477	544.396		105	35.354
Central African Republic	CAF	2013		45.2383	0.984182	33.1055	-1.51872	364.367		404	32.769
Central African Republic	CAF	2014		46.4634	0.711062	37.0312	-1.62495	409.85		867	29.4
Central African Republic	CAF	2015	30	48.7767	0.455852	41.4031	-1.61795	366.323	0.07	251	29.449
Central African Republic	CAF	2016		55.2096	0.599534	32.8231	-1.56173	387.176		227	30.947
Central African Republic	CAF	2017	30	56.4159	0.72882	31.4564	-1.56295	432.324		357	30.645
Central African Republic	CAF	2018		41.6727	0.688533	51.3766	-1.5339	467.075	0.069	469	29.315
Central African Republic	CAF	2019	31	60.5582	0.818895	27.898	-1.58167	460.789		192	32.107
Central African Republic	CAF	2020		49.6755	1.22142	35.9027	-1.61232	474.517		372	32.422
Central African Republic	CAF	2021	32	49.5749	1.26395	35.7914	-1.57756	505.415	0.022	670	31.966
Central African Republic	CAF	2022		47.6457	1.49499	36.5508	-1.59032	481.563	0.029	276	34.103
Central African Republic	CAF	2023		45.023	1.53037	39.8819	-1.57076	505.009	0.074	317	33.999
Central African Republic	CAF	2024					-1.57655			395
Chad	TCD	2000	15	56.2163	1.59995	3.59879	-0.795679	239.472	0.028	20	40.557
Chad	TCD	2001		58.2609	1.4227	3.60915		285.277		10	48.018
Chad	TCD	2002		64.7354	1.61589	2.65502	-1.20173	321.595		15	44.255
Chad	TCD	2003		47.4155	1.33924	16.8306	-1.60856	424.307		17	42.69
Chad	TCD	2004		51.0141	1.47852	10.4311	-1.27226	654.506	0.035	45	44.962
Chad	TCD	2005	16	56.2225	1.10235	10.0519	-1.37651	838.059		30	38.914
Chad	TCD	2006		63.6604	0.763795	11.1203	-1.44844	906.897	0.034	110	38.982
Chad	TCD	2007		64.9183	0.817643	6.29346	-1.43517	980.484		102	40.353
Chad	TCD	2008		68.8159	0.619778	5.85889	-1.48225	1166.37		72	40.157
Chad	TCD	2009		65.013	0.701138	8.12648	-1.33616	1035.64		22	43.199
Chad	TCD	2010	22	67.5845	0.647935	5.94576	-1.29691	1141.8		8	41.305
Chad	TCD	2011		60.7702	0.602469	12.7518	-1.2336	1308.14		6	46.377
Chad	TCD	2012		59.4282	0.656275	10.8364	-1.31857	1354.34	0.04	7	46.622
Chad	TCD	2013		58.638	0.835442	7.99997	-1.25333	1304.89	0.042	2	49.914
Chad	TCD	2014		55.7212	0.940916	10.8801	-1.25147	1278.79	0.043	10	47.605
Chad	TCD	2015	27	56.7242	0.723524	17.0632	-1.23236	993.991	0.048	31	40.237
Chad	TCD	2016		55.1461	0.644284	22.6697	-1.18727	861.832	0.036	13	43.05
Chad	TCD	2017	28	59.8793	0.525809	19.9179	-1.10043	854.461	0.042	22	39.657
Chad	TCD	2018		64.3761	0.46814	19.3388	-1.17806	948.657	0.05	56	39.127
Chad	TCD	2019	27	63.7034	0.513497	19.101	-1.26227	893.336	0.052	134	35.421
Chad	TCD	2020		69.7613	0.55168	16.0763	-1.22918	866.948	0.058	118	36.985
Chad	TCD	2021	29	69.4804	0.736476	11.1903	-1.24046	946.358	0.056	137	37.005
Chad	TCD	2022		58.1755	0.925891	18.7169	-1.17543	966.036	0.082	133	40.082
Chad	TCD	2023		51.6791	1.2617	22.3518	-1.21546	949.333	0.085	111	41.542
Chad	TCD	2024					-1.1005			120
Comoros	COM	2000	26	79.7182	0.891725	5.88646	-1.31199	633.31			32.957
Comoros	COM	2001		81.2723	0.534332	7.87039		681.164			34.536
Comoros	COM	2002		76.1934	0.956706	6.70331	-0.795428	764.613			39.525
Comoros	COM	2003		73.1175	0.852939	11.2668	-1.32459	959.692			36.517
Comoros	COM	2004		73.0158	0.791332	12.1038	-1.44263	1072.28	0.198		35.871
Comoros	COM	2005	32	76.2013	0.69429	9.42711	-1.60131	1105.79	0.196		34.356
Comoros	COM	2006		79.4947	0.645377	6.06418	-1.59236	1138.48			34.747
Comoros	COM	2007		81.8126	0.56598	4.31239	-1.59062	1289.74			34.894
Comoros	COM	2008		83.3743	0.433373	4.37351	-1.67074	1455.03			34.096
Comoros	COM	2009		84.1247	0.379072	4.36778	-1.63897	1410.3	0.199		33.822
Comoros	COM	2010	39	80.4608	0.376683	8.20615	-1.63053	1386.57			35.38
Comoros	COM	2011		64.0438	0.956722	14.301	-1.69691	1531.44			37.844
Comoros	COM	2012		67.9659	0.795344	14.5009	-1.59026	1490.32	0.181		36.895
Comoros	COM	2013		68.008	0.659783	16.573	-1.528	1603.33			36.609
Comoros	COM	2014		65.5141	0.554914	21.1548	-1.32146	1615.72			36.995
Comoros	COM	2015	44	74.9879	0.466126	10.7869	-1.41058	1329.37			38.418
Comoros	COM	2016		71.2665	0.574	12.6649	-1.3535	1365.48	0.291		36.978
Comoros	COM	2017	46	63.8444	0.675848	19.8041	-1.29554	1423.92			40.586
Comoros	COM	2018		67.2449	0.765538	13.138	-1.31344	1527.41	0.285		39.08
Comoros	COM	2019	46	61.828	0.832448	17.5701	-1.34315	1510.23			41.812
Comoros	COM	2020		61.9016	1.29288	11.9889	-1.37486	1519.35	0.441	8	47.332
Comoros	COM	2021	48	55.5526	0.945172	25.8258	-1.55204	1554.97		7	46.163
Comoros	COM	2022		43.5036	0.873431	43.3046	-1.37679	1465.48	0.424	12	42.505
Comoros	COM	2023		56.5667	0.846394	26.7738	-1.24893	1560.27		12	44.161
Comoros	COM	2024					-1.2086			10
Congo	COG	2000	21	52.6997	0.514695	11.5211	-1.31116	1152.88			36.915
Congo	COG	2001		45.785	0.965118	8.74562		929.113			48.105
Congo	COG	2002		61.4227	0.431983	11.6272	-1.311	998.444			38.23
Congo	COG	2003		61.4346	0.50116	11.1467	-1.31939	1121.42			38.96
Congo	COG	2004		55.6084	0.435176	20.2367	-1.14528	1431.19	0.212		39.846
Congo	COG	2005	25	51.9786	0.432135	21.3154	-1.28559	1799.05			37.391
Congo	COG	2006		48.6821	0.554922	17.2701	-1.28843	2103.58	0.204		43.284
Congo	COG	2007		49.1568	0.586519	18.393	-1.31165	2206.47	0.101		43.024
Congo	COG	2008		37.8508	1.09929	11.493	-1.12721	2832.09			51.128
Congo	COG	2009		50.3718	0.61771	19.1671	-1.12546	2271.15			43.853
Congo	COG	2010	30	42.1545	0.828388	11.735	-1.1177	2946.56	0.111		46.138
Congo	COG	2011		41.0913	0.65134	20.9631	-1.10321	3396.17	0.114		47.444
Congo	COG	2012		29.738	0.818937	26.3597	-1.04754	3732.33			50.014
Congo	COG	2013		30.6526	0.93665	19.8441	-1.10968	3697.42			51.399
Congo	COG	2014		31.1863	0.94695	18.1732	-0.929383	3599.95			52.701
Congo	COG	2015	38	32.4601	1.11883	18.9144	-0.835183	2332.53			50.02
Congo	COG	2016		44.2568	1.11958	5.11391	-0.812324	2093.11	0.102		51.97
Congo	COG	2017	36	45.5901	0.907355	7.24547	-0.868556	2211.63			48.468
Congo	COG	2018		50.2575	0.620254	5.47522	-0.977052	2694.43	0.099		48.936
Congo	COG	2019	39	42.172	1.02925	7.01048	-0.94206	2488.42			50.309
Congo	COG	2020		25.1902	1.73445	10.9966	-1.17354	1993.59			54.565
Congo	COG	2021	41	23.5775	1.72021	6.88427	-1.18959	2270.84			54.791
Congo	COG	2022		26.9292	0.805186	14.4324	-1.13138	2309.4	0.173		51.318
Congo	COG	2023		27.9707	1.12095	14.8634	-1.16694	2291.27			51.656
Congo	COG	2024					-1.11064
Côte d'Ivoire	CIV	2000	22	75.2957	0.586899	1.98552	-1.14695	839.078		70	36.952
Côte d'Ivoire	CIV	2001		77.2206	0.509783	2.00521		851.802		21	43.794
Côte d'Ivoire	CIV	2002		75.8315	0.543295	2.2463	-1.31375	919.202		120	38.418
Côte d'Ivoire	CIV	2003		76.0766	0.515493	4.97327	-1.31877	1108.76		132	38.123
Côte d'Ivoire	CIV	2004		77.0148	0.559932	3.19876	-1.61689	1169.89	0.106	63	38.513
Côte d'Ivoire	CIV	2005	25	76.7357	0.52909	3.96596	-1.53454	1177.25	0.085	36	37.248
Côte d'Ivoire	CIV	2006		75.9454	0.557799	3.81205	-1.37834	1198.62		15	42.518
Côte d'Ivoire	CIV	2007		68.755	0.679661	9.28857	-1.40156	1338.9		4	45.58
Côte d'Ivoire	CIV	2008		65.5496	0.679557	12.7618	-1.36058	1562.73	0.128	14	44.089
Côte d'Ivoire	CIV	2009		57.4266	0.837446	9.92927	-1.14862	1531.66		2	50.797
Côte d'Ivoire	CIV	2010	33	56.4793	0.839973	10.2002	-1.25141	1531.08		52	43.412
Côte d'Ivoire	CIV	2011		59.2073	0.579836	12.191	-1.20852	1545.96	0.14	211	40.886
Côte d'Ivoire	CIV	2012		52.7981	0.746073	15.6525	-1.06665	1577.96		62	44.955
Côte d'Ivoire	CIV	2013		56.1593	0.727828	8.71003	-0.923806	1805.71		63	46.829
Côte d'Ivoire	CIV	2014		51.1434	0.777603	13.4717	-0.72184	1992.97	0.214	50	48.715
Côte d'Ivoire	CIV	2015	43	42.5893	0.804453	13.0823	-0.59996	1814.72		23	52.001
Côte d'Ivoire	CIV	2016		40.0125	0.853021	14.9304	-0.610353	1862.6		28	52.252
Côte d'Ivoire	CIV	2017	44	39.2152	0.93267	13.0341	-0.595862	1964.3		36	52.617
Côte d'Ivoire	CIV	2018		39.2853	0.898626	12.2774	-0.507924	2130.87	0.351	38	53.457
Côte d'Ivoire	CIV	2019	41	37.2605	0.963288	12.9988	-0.489134	2141.77	0.149	74	51.893
Côte d'Ivoire	CIV	2020		31.9921	1.33183	13.544	-0.487581	2179.73	0.153	164	53.146
Côte d'Ivoire	CIV	2021	43	28.3671	1.59011	13.3501	-0.500597	2455.98	0.167	109	54.853
Côte d'Ivoire	CIV	2022		32.5492	1.49068	10.4618	-0.354842	2333.37	0.162	73	56.505
Côte d'Ivoire	CIV	2023		31.9931	1.40124	11.8328	-0.31851	2554.67	0.166	72	56.605
Côte d'Ivoire	CIV	2024					-0.315718			79
Democratic Republic of the Congo	COD	2000	21	54.0256	0.0622103	23.2967	-2.03212	1195.18		200	30.893
Democratic Republic of the Congo	COD	2001		72.3802	0.106413	13.261		207.163		258	29.692
Democratic Republic of the Congo	COD	2002		71.2881	0.104292	14.1396	-2.14927	162.474		278	24.303
Democratic Republic of the Congo	COD	2003		68.0304	0.229553	18.5832	-2.15596	161.578		264	24.374
Democratic Republic of the Congo	COD	2004		72.1138	0.202683	16.9786	-1.81298	180.666	0.107	187	26.557
Democratic Republic of the Congo	COD	2005	23	69.3636	0.206908	18.6647	-1.73462	214.54		237	26.046
Democratic Republic of the Congo	COD	2006		68.512	0.211256	19.6348	-1.59699	255.445		305	28.01
Democratic Republic of the Congo	COD	2007		63.8558	0.219434	23.5688	-1.62861	296.953		213	29.15
Democratic Republic of the Congo	COD	2008		49.6874	0.251562	38.2132	-1.64464	356.323		399	28.286
Democratic Republic of the Congo	COD	2009		45.4101	0.309439	41.1267	-1.64941	282.791	0.088	595	27.132
Democratic Republic of the Congo	COD	2010	30	37.0503	0.383624	44.7702	-1.67767	326.21		286	29.913
Democratic Republic of the Congo	COD	2011		38.8241	0.346676	45.0462	-1.63878	372.514		631	28.556
Democratic Republic of the Congo	COD	2012		40.275	0.519784	37.6367	-1.57334	409.931		749	30.579
Democratic Republic of the Congo	COD	2013		39.433	0.466843	40.1458	-1.36913	460.37	0.085	678	31.67
Democratic Republic of the Congo	COD	2014		38.7164	0.515711	40.1953	-1.40089	489.176		763	31.739
Democratic Republic of the Congo	COD	2015	37	37.4267	0.625088	39.2708	-1.47271	495.551		586	33.795
Democratic Republic of the Congo	COD	2016		37.2919	0.530298	43.2284	-1.38463	459.765		646	31.615
Democratic Republic of the Congo	COD	2017	40	40.1247	0.398018	42.4731	-1.45883	453.597		785	32.264
Democratic Republic of the Congo	COD	2018		41.6106	0.488731	35.2169	-1.51909	533.456		1581	30.444
Democratic Republic of the Congo	COD	2019	40	38.497	0.554903	38.8266	-1.57826	547.546	0.162	2482	31.669
Democratic Republic of the Congo	COD	2020		39.7179	0.638773	37.4804	-1.68088	516.962		3421	28.331
Democratic Republic of the Congo	COD	2021	42	39.1287	0.648311	37.5072	-1.70496	558.234	0.171	4248	31.076
Democratic Republic of the Congo	COD	2022		37.0766	0.724496	38.622	-1.73412	618.504	0.208	4421	28.66
Democratic Republic of the Congo	COD	2023		38.0035	0.689906	36.9912	-1.65795	635.87		2719	30.136
Democratic Republic of the Congo	COD	2024					-1.69344			2315
Djibouti	DJI	2000	23	44.3852	1.40983	13.1314	-1.31199	1044.91		1	48.01
Djibouti	DJI	2001		48.033	1.25085	11.8263		1051.73		0	58.493
Djibouti	DJI	2002		40.9015	1.28561	24.0226	-0.795428	1052.64		1	53.563
Djibouti	DJI	2003		34.3765	1.50298	29.7209	-0.80828	1083.61		0	55.567
Djibouti	DJI	2004		38.8053	1.43785	19.6811	-0.716212	1132.8	0.156	1	55.922
Djibouti	DJI	2005	28	35.3105	1.39653	27.1686	-0.840032	1186.51	0.167	0	51.617
Djibouti	DJI	2006		31.156	1.72493	27.3581	-1.04307	1262.25	0.216	2	54.491
Djibouti	DJI	2007		30.1808	1.73417	26.353	-0.877262	1361.65		1	56.775
Djibouti	DJI	2008		27.9018	1.83016	20.685	-0.811751	1547.64		2	58.644
Djibouti	DJI	2009		26.6279	1.90362	20.3588	-0.733848	1564.18		6	57.952
Djibouti	DJI	2010	37	26.4621	1.85622	17.4593	-0.729242	1659.35		8	55.704
Djibouti	DJI	2011		24.2288	2.14218	11.283	-0.725115	1834.64		2	63.145
Djibouti	DJI	2012		22.948	1.88867	18.4859	-0.768966	1966.87		2	61.249
Djibouti	DJI	2013		24.0581	1.80592	13.0907	-0.721638	2075.94		4	61.398
Djibouti	DJI	2014		22.6595	1.76028	16.5813	-0.690533	2214.62	0.201	17	58.735
Djibouti	DJI	2015	41	19.0374	1.7077	28.8206	-0.752427	2376.12		6	56.807
Djibouti	DJI	2016		23.1786	1.3292	26.9653	-0.712875	2510.43		5	57.752
Djibouti	DJI	2017	45	26.0397	1.14626	26.1916	-0.779234	2618.96		3	56.848
Djibouti	DJI	2018		26.9064	1.33992	18.5642	-0.772011	2718.08		0	62.212
Djibouti	DJI	2019	45	28.1612	1.28569	17.0982	-0.652955	2837.17		9	57.694
Djibouti	DJI	2020		31.937	1.07291	20.8992	-0.675007	2844.89		6	56.939
Djibouti	DJI	2021	44	27.3415	0.766651	44.676	-0.647701	3025.91		12	51.25
Djibouti	DJI	2022		29.0599	1.06819	27.1612	-0.558181	3133.26	0.211	4	57.717
Djibouti	DJI	2023		28.8415	1.05232	23.5956	-0.536184	3397.52		9	57.524
Djibouti	DJI	2024					-0.493044			2
Equatorial Guinea	GNQ	2000	20	52.1698	0.523023	3.87001	-1.36547	1647.43		1	46.833
Equatorial Guinea	GNQ	2001		54.3256	0.391805	14.9786		2232.4		1	54.946
Equatorial Guinea	GNQ	2002		82.3794	0.360006	4.16782	-1.36532	2595.5		1	47.22
Equatorial Guinea	GNQ	2003		75.8609	0.397977	2.87464	-1.37315	4403.43		1	50.584
Equatorial Guinea	GNQ	2004		73.2994	0.353404	3.2223	-1.37414	6597.68	0.17	2	51.449
Equatorial Guinea	GNQ	2005	23	67.6603	0.401041	2.90806	-1.40362	8641.78		0	50.343
Equatorial Guinea	GNQ	2006		61.2279	0.457872	5.19772	-1.40514	10193.9		1	55.76
Equatorial Guinea	GNQ	2007		59.3088	0.480713	5.72557	-1.40284	12633.6		2	56.024
Equatorial Guinea	GNQ	2008		55.9369	0.483629	3.64552	-1.40105	18284.3		1	59.142
Equatorial Guinea	GNQ	2009		52.7789	0.769203	5.25197	-1.36691	13285.8		5	57.173
Equatorial Guinea	GNQ	2010	29	58.0618	0.645149	3.7211	-1.31728	13720.2		1	54.232
Equatorial Guinea	GNQ	2011		56.7251	0.592392	3.8259	-1.32091	17198.2		0	60.745
Equatorial Guinea	GNQ	2012		53.3505	0.702691	2.34884	-1.32074	17308.6		1	60.707
Equatorial Guinea	GNQ	2013		63.2198	0.617882	0.559903	-1.35305	16304.1		0	59.86
Equatorial Guinea	GNQ	2014		63.9214	0.651146	0.21933	-0.97745	15548.7		1	60.264
Equatorial Guinea	GNQ	2015	41	68.1475	0.743282	0.67374	-0.997542	9068.91		1	56.145
Equatorial Guinea	GNQ	2016		69.0903	0.865305	0.92395	-0.973975	7453.2		3	55.901
Equatorial Guinea	GNQ	2017	44	70.5973	0.789998	0.899687	-1.00521	7809.11	0.325	6	53.942
Equatorial Guinea	GNQ	2018		70.0991	0.815019	1.1281	-0.984675	8230.04		6	54.726
Equatorial Guinea	GNQ	2019	44	73.7735	0.805064	0.801584	-1.00958	6804.15		2	54.433
Equatorial Guinea	GNQ	2020		70.5683	1.03385	0.713982	-1.06238	5764.05		3	54.79
Equatorial Guinea	GNQ	2021	46	64.8937	1.14401	1.72983	-1.04159	6945.63		1	57.553
Equatorial Guinea	GNQ	2022		66.7187	0.86761	1.89094	-1.17576	7589.3	0.153	1	56.56
Equatorial Guinea	GNQ	2023		65.9832	1.12861	1.03862	-1.15234	6677.79			50.282
Equatorial Guinea	GNQ	2024					-1.18251
Eritrea	ERI	2000	26	63.768	2.05245	0.640576	-1.31199	243.299	0.045	63	39.22
Eritrea	ERI	2001		55.928	1.79195	13.7991		251.832	0.041	4	48.412
Eritrea	ERI	2002		46.0217	2.11956	22.2897	-0.933258	235.857	0.055	1	49.421
Eritrea	ERI	2003		38.9331	1.66898	38.3195	-0.942503	270.066	0.042	7	44.057
Eritrea	ERI	2004		35.1397	1.55934	42.6153	-1.06857	330.339	0.055	5	44.213
Eritrea	ERI	2005	32	35.2389	0.852987	52.3344	-0.914315	319.434	0.046	2	40.993
Eritrea	ERI	2006		34.4565	0.818265	53.3458	-1.1331	346.699	0.05	3	40.837
Eritrea	ERI	2007		44.0931	1.21488	32.8918	-1.13186	371.814	0.045	4	44.038
Eritrea	ERI	2008		32.596	1.64659	42.3725	-1.14172	327.613	0.045	16	42.607
Eritrea	ERI	2009		45.8219	1.06634	34.5164	-1.15153	448.997	0.044	7	42.589
Eritrea	ERI	2010	40	48.6554	1.00715	30.4436	-1.191	539.704	0.044	3	44.588
Eritrea	ERI	2011		36.4744	0.765247	48.7018	-1.29377	688.673	0.045	4	42.291
Eritrea	ERI	2012		52.5527	0.790661	26.3205	-1.32638	742.477	0.05	4	43.955
Eritrea	ERI	2013		48.7728	0.776559	35.5964	-1.39192	636.875	0.056	4	41.884
Eritrea	ERI	2014		50.9621	0.512502	35.9449	-1.24906	841.384	0.066	1	44.086
Eritrea	ERI	2015	45	42.9043	0.73755	40.7339	-1.27422	648.261	0.068	5	43.737
Eritrea	ERI	2016		59.0001	0.734064	21.3641	-1.26697	695.645	0.072	6	43.008
Eritrea	ERI	2017	46	46.9737	1.00828	28.7515	-1.27392	604.361	0.071	1	47.629
Eritrea	ERI	2018		50.7753	0.625415	34.5004	-1.42378	628.183	0.088	2	42.113
Eritrea	ERI	2019	46	46.4407	0.741661	37.603	-1.4628	611.638	0.077	0	45.904
Eritrea	ERI	2020		48.557	0.841508	31.9237	-1.39757	641.75	0.088	6	42.222
Eritrea	ERI	2021	45	49.6721	0.887096	29.0973	-1.39465	660.245	0.085	2	45.683
Eritrea	ERI	2022		54.2942	0.90046	22.4704	-1.34349	699.024	0.088	4	44.415
Eritrea	ERI	2023		48.4457	0.849411	28.4961	-1.38025	768.176		1	46.065
Eritrea	ERI	2024					-1.45618			3
Eswatini	SWZ	2000	36	18.5252	2.41081	4.13562	-0.279372	1668.97		2	64.206
Eswatini	SWZ	2001		17.862	2.38432	11.0967		1467.49	0.17	1	69.067
Eswatini	SWZ	2002		16.8842	2.42258	15.8238	-0.279121	1351.89		0	67.693
Eswatini	SWZ	2003		15.0579	2.91704	18.226	-0.80828	2060.15	0.15	3	64.858
Eswatini	SWZ	2004		14.644	3.02394	20.5023	-1.12978	2581.26	0.159	0	66.512
Eswatini	SWZ	2005	44	13.2446	3.6406	18.8279	-1.08425	2945.41		3	64.525
Eswatini	SWZ	2006		12.4043	3.45949	25.9558	-0.560993	3035.01		2	68.146
Eswatini	SWZ	2007		12.1358	3.7541	23.4364	-0.59049	3180.85		0	71.581
Eswatini	SWZ	2008		10.5423	4.45392	24.3083	-0.314749	2999.81		3	71.986
Eswatini	SWZ	2009		10.4238	4.46149	23.1754	-0.398493	3239.72	0.157	1	73.431
Eswatini	SWZ	2010	51	10.4554	4.22809	25.5475	-0.255726	3992.93		4	70.621
Eswatini	SWZ	2011		10.4833	3.61156	32.0387	-0.354278	4312.32	0.098	3	69.241
Eswatini	SWZ	2012		10.5082	3.41336	30.9579	-0.187213	4347.95		10	67.893
Eswatini	SWZ	2013		10.5304	3.32492	29.9505	-0.20761	4068.7		6	68.431
Eswatini	SWZ	2014		10.5505	2.73972	36.7204	-0.274083	3892.44		1	67.456
Eswatini	SWZ	2015	55	10.5686	2.94745	32.6675	-0.290018	3551.94		5	66.691
Eswatini	SWZ	2016		10.5852	2.84598	32.6483	-0.248356	3319.69	0.093	1	68.189
Eswatini	SWZ	2017	60	10.4967	3.54255	23.7461	-0.287503	3803.18	0.18	0	73.861
Eswatini	SWZ	2018		10.1475	3.39841	27.7162	-0.450854	3994.05	0.238	5	68.188
Eswatini	SWZ	2019	58	9.21699	4.40824	23.2578	-0.496223	3809.98		6	71.488
Eswatini	SWZ	2020		11.291	3.53693	20.5512	-0.623555	3338.74	0.138	22	65.806
Eswatini	SWZ	2021	56	10.7679	3.65005	22.4499	-0.723303	4020.27		65	64.796
Eswatini	SWZ	2022		10.3377	3.24393	27.9351	-0.632065	3930.45	0.561	120	61.005
Eswatini	SWZ	2023		11.0184	3.20378	28.4399	-0.717774	3948.52	0.557	48	61.981
Eswatini	SWZ	2024					-0.781141			17
Ethiopia	ETH	2000	13	35.9573	1.79949	16.2582	-1.35181	121.183	0.021	135	34.381
Ethiopia	ETH	2001		34.554	2.01544	17.0707		116.65	0.028	42	45.457
Ethiopia	ETH	2002		37.4626	2.08122	12.6997	-1.28593	109.273	0.029	220	39.807
Ethiopia	ETH	2003		34.4589	2.27635	14.1954	-1.44246	116.534	0.026	115	41.244
Ethiopia	ETH	2004		34.8663	1.32567	29.6355	-1.01203	133.059	0.026	113	38.123
Ethiopia	ETH	2005	17	31.3403	1.72819	22.2401	-0.918343	158.06	0.031	95	37.995
Ethiopia	ETH	2006		38.7753	1.12013	32.3561	-0.758901	188.985	0.026	53	40.082
Ethiopia	ETH	2007		36.9962	1.33307	33.3482	-0.638609	232.582	0.022	39	42.611
Ethiopia	ETH	2008		38.4773	0.514249	46.7612	-0.530582	304.596	0.024	111	36.865
Ethiopia	ETH	2009		41.5408	0.907007	33.5921	-0.520822	325.714	0.025	95	40.588
Ethiopia	ETH	2010	27	42.2902	0.943963	34.4424	-0.477274	295.827		176	37.068
Ethiopia	ETH	2011		46.5379	0.381175	37.5274	-0.516923	327.208		78	37.843
Ethiopia	ETH	2012		42.1675	1.06663	27.9443	-0.421253	440.616		119	43.112
Ethiopia	ETH	2013		42.4041	1.09967	23.2715	-0.520772	472.802		111	44.005
Ethiopia	ETH	2014		38.4741	0.714796	23.4349	-0.451423	535.654		59	45.752
Ethiopia	ETH	2015	34	36.7435	0.965409	18.2611	-0.529853	607.302		191	44.231
Ethiopia	ETH	2016		35.4316	0.90003	20.2343	-0.477101	676.151		551	43.883
Ethiopia	ETH	2017	35	34.4016	0.861269	35.3574	-0.528128	700.255		309	41.138
Ethiopia	ETH	2018		35.4916	0.766426	36.1473	-0.532881	711.942	0.075	483	40.297
Ethiopia	ETH	2019	36	37.8194	0.730885	34.3336	-0.525338	799.758	0.089	133	42.44
Ethiopia	ETH	2020		33.0791	0.982785	34.4484	-0.551689	812.419	0.102	622	41.535
Ethiopia	ETH	2021	35	37.0075	0.979262	28.2907	-0.650462	812.685	0.1	1567	39.457
Ethiopia	ETH	2022		44.5962	0.720801	25.3187	-0.700077	948.778	0.105	1279	38.889
Ethiopia	ETH	2023		46.2686	0.614245	26.8751	-0.688376	1241.43	0.143	1397	38.72
Ethiopia	ETH	2024					-0.645991			2575
Gabon	GAB	2000	28	53.158	1.06384	2.12562	-0.605915	4241.29		0	56.943
Gabon	GAB	2001		50.8229	1.263	1.32848		3835.76		1	63.993
Gabon	GAB	2002		54.1372	1.1996	1.62598	-0.605799	3966.48		1	60.707
Gabon	GAB	2003		50.1283	1.43529	1.64446	-0.611716	4710.75		0	63.957
Gabon	GAB	2004		50.2837	1.35957	1.56543	-1.09885	5465.79	0.278	1	60.481
Gabon	GAB	2005	37	51.966	1.05433	3.96627	-1.04167	6465.79		0	58.117
Gabon	GAB	2006		51.1439	1.21738	2.32242	-0.778583	6737.93		2	61.293
Gabon	GAB	2007		49.5	1.23347	2.85311	-0.776777	8003.54		0	64.227
Gabon	GAB	2008		52.7104	1.06247	2.03192	-0.775369	9688.65	0.0968	2	61.852
Gabon	GAB	2009		50.0769	1.54067	1.53728	-0.612992	7343.21		1	64.363
Gabon	GAB	2010	45	25.5056	1.57326	1.14024	-0.581348	8356.75		0	68.777
Gabon	GAB	2011		27.7315	1.58558	1.08781	-0.795366	10219.1		1	69.238
Gabon	GAB	2012		28.0048	1.48286	0.482022	-0.955343	9296.96		2	67.173
Gabon	GAB	2013		28.593	1.82303	0.369391	-0.83565	9197.69		2	68.488
Gabon	GAB	2014		28.1298	1.51669	0.999411	-0.681368	9201.34		1	69.232
Gabon	GAB	2015	50	25.9047	1.56549	0.821014	-0.702389	7047.11		3	66.595
Gabon	GAB	2016		22.5509	2.01055	0.687726	-0.66348	6677.06	0.34	5	68.592
Gabon	GAB	2017	51	25.1564	1.75976	0.608238	-0.827205	6921.86	0.653	3	66.818
Gabon	GAB	2018		23.1142	1.61284	1.22248	-0.779531	7603.93	0.618	4	67.568
Gabon	GAB	2019	49	23.088	1.66963	0.568167	-0.788091	7441.18	0.603	4	66.546
Gabon	GAB	2020		20.3717	1.89679	10.721	-0.813455	6605.8	0.586	5	65.832
Gabon	GAB	2021	49	21.5661	1.65492	3.95681	-0.588665	8181.41		8	66.311
Gabon	GAB	2022		17.9163	1.88505	3.62383	-0.594357	8409.21	0.521	5	69.684
Gabon	GAB	2023		17.2715	2.05877	4.44977	-0.584097	8071.4		10	68.827
Gabon	GAB	2024					-0.567155			9
Gambia	GMB	2000	29	13.6801	0.60153	78.4055	-0.590207	693.876		6	40.917
Gambia	GMB	2001		13.3888	0.610598	76.7364		670.548		12	40.739
Gambia	GMB	2002		13.1479	0.542147	75.3555	-0.590043	577.521		9	42.376
Gambia	GMB	2003		11.7271	0.5869	73.4259	-0.595322	534.258	0.099	10	42.721
Gambia	GMB	2004		9.84813	0.780814	70.8122	-0.671476	593.286	0.102	3	46.039
Gambia	GMB	2005	36	11.5071	0.816792	68.5614	-0.787441	616.484	0.1	3	44.854
Gambia	GMB	2006		13.045	0.884587	65.9129	-0.918755	614.535	0.102	4	45.149
Gambia	GMB	2007		15.0681	0.706195	65.6867	-0.777815	724.736	0.09	1	47.341
Gambia	GMB	2008		16.4397	0.728848	62.6557	-0.769639	859.121	0.096	3	47.031
Gambia	GMB	2009		17.0042	0.905574	57.256	-0.650223	774.885		4	48.337
Gambia	GMB	2010	41	18.0324	0.918232	54.0977	-0.638967	801.039		2	49.533
Gambia	GMB	2011		19.2284	1.04375	51.7522	-0.626845	710.613		1	50.994
Gambia	GMB	2012		19.4466	1.20622	47.2251	-0.576766	692.575		5	50.377
Gambia	GMB	2013		20.9003	1.08377	46.0145	-0.609869	653.868		0	53.119
Gambia	GMB	2014		26.8267	1.09229	27.9943	-0.541009	568.004		4	52.577
Gambia	GMB	2015	43	23.4156	0.998292	34.9515	-0.633568	619.536	0.096	6	50.623
Gambia	GMB	2016		30.4993	1.28977	26.725	-0.61107	650.057		5	52.339
Gambia	GMB	2017	44	26.669	1.06098	36.6838	-0.522075	642.521	0.099	12	49.664
Gambia	GMB	2018		20.1851	1.04798	39.437	-0.502341	696.222	0.124	5	51.878
Gambia	GMB	2019	46	20.2988	1.28751	27.2222	-0.536152	738.189	0.077	6	54.762
Gambia	GMB	2020		24.8582	1.95139	23.5501	-0.587422	720.336	0.078	14	54.494
Gambia	GMB	2021	46	27.6148	1.28644	34.9096	-0.51319	795.381	0.104	14	51.15
Gambia	GMB	2022		29.4383	1.54287	23.6308	-0.502496	836.254	0.104	6	54.907
Gambia	GMB	2023		33.7827	1.29955	17.449	-0.468348	890.028	0.09	6	55.113
Gambia	GMB	2024					-0.535824			5
Ghana	GHA	2000	24	38.0132	0.730891	2.53973	-0.0680213	628.842		8	51.242
Ghana	GHA	2001		33.5791	0.841266	7.59606		650.225		7	55.18
Ghana	GHA	2002		31.9736	0.65024	21.3784	-0.224037	734.675	0.09	7	53.362
Ghana	GHA	2003		36.0099	0.943455	15.4427	-0.438919	882.323		11	53.289
Ghana	GHA	2004		32.448	0.950902	23.2018	-0.396277	994.793	0.148	6	54.012
Ghana	GHA	2005	26	23.5328	1.75685	19.7401	-0.267334	1176.64		3	55.474
Ghana	GHA	2006		35.2037	1.65232	17.0754	0.0739642	1343.82		3	60.902
Ghana	GHA	2007		39.5798	1.6363	13.6056	0.0561228	1545.99	0.07	5	60.308
Ghana	GHA	2008		41.0812	1.64285	12.1334	0.0686849	1703.33	0.077	11	59.384
Ghana	GHA	2009		34.9313	2.04712	13.6583	0.078926	1494.88	0.082	17	60.155
Ghana	GHA	2010	35	34.3018	2.26015	13.5052	0.0369136	1783.84	0.091	8	58.962
Ghana	GHA	2011		32.9976	2.35423	12.0018	0.0061563	2054.54	0.095	5	64.44
Ghana	GHA	2012		36.881	1.9787	8.61841	0.0221723	2085.6	0.093	27	60.617
Ghana	GHA	2013		38.8757	1.85814	16.561	-0.0886219	2294.03	0.1	32	57.669
Ghana	GHA	2014		45.0506	1.40883	15.6901	-0.0881126	1953.65	0.108	21	55.749
Ghana	GHA	2015	44	35.8031	1.59378	24.9317	-0.085856	1721.69	0.114	40	54.092
Ghana	GHA	2016		37.8237	1.30039	12.7975	0.0177698	1913.19	0.123	39	56.863
Ghana	GHA	2017	45	22.6508	1.63059	14.6579	0.0366097	2012.97	0.089	42	59.418
Ghana	GHA	2018		33.4816	1.37083	7.8623	-0.0138733	2196.61	0.144	53	58.679
Ghana	GHA	2019	46	28.9769	1.97206	8.70263	-0.0546834	2186.19	0.104	77	59.225
Ghana	GHA	2020		23.7504	2.52819	17.9547	-0.0103657	2196.55	0.166	176	59.118
Ghana	GHA	2021	48	26.4985	2.09937	14.797	-0.0445107	2445.5	0.128	101	59.176
Ghana	GHA	2022		25.0321	2.03709	15.8106	-0.0662946	2240.28	0.143	175	57.889
Ghana	GHA	2023		26.6772	1.86318	8.53309	-0.0177779	2384.13	0.266	244	58.482
Ghana	GHA	2024					0.0595796			337
Guinea	GIN	2000	16	65.3731	0.301292	27.9133	-0.927403	479.168	0.091	146	30.172
Guinea	GIN	2001		63.4135	0.371071	28.6371		445.686		59	35.086
Guinea	GIN	2002		59.4045	0.640118	28.3196	-1.0002	463.717		11	40.191
Guinea	GIN	2003		62.5409	0.42213	28.2992	-1.00688	536.485		1	42.896
Guinea	GIN	2004		69.5069	0.241642	25.101	-0.85877	553.023	0.109	4	40.804
Guinea	GIN	2005	19	70.1505	0.261291	23.0176	-0.851713	487.39	0.102	8	35.783
Guinea	GIN	2006		70.8102	0.248357	21.5704	-1.27499	446.984		6	37.896
Guinea	GIN	2007		71.8759	0.240667	20.4102	-1.22773	650.126		13	38.035
Guinea	GIN	2008		70.9491	0.269593	19.9852	-1.16363	703.511		10	39.423
Guinea	GIN	2009		72.4966	0.260251	19.4583	-1.18689	662.177		25	37.238
Guinea	GIN	2010	26	69.2923	0.362978	19.4228	-1.11367	659.236		18	36.861
Guinea	GIN	2011		59.9856	0.510367	25.9008	-1.16197	636.7		5	41.819
Guinea	GIN	2012		62.3993	0.514314	21.9864	-1.22119	676.376		18	39.867
Guinea	GIN	2013		61.9012	0.488588	22.582	-1.11045	748.455		37	39.33
Guinea	GIN	2014		58.3592	0.611523	18.4985	-1.00087	765.147	0.161	18	43.164
Guinea	GIN	2015	33	49.3524	0.429311	23.4626	-0.945218	747.357	0.083	29	41.592
Guinea	GIN	2016		49.7617	0.663744	27.233	-0.878433	711.997	0.081	20	43.354
Guinea	GIN	2017	36	64.5976	0.600662	9.49533	-0.888003	833.599		15	44.122
Guinea	GIN	2018		67.1158	0.617401	10.7929	-0.838006	933.274	0.219	43	42.901
Guinea	GIN	2019	39	59.2154	0.920952	10.7964	-0.67651	1031.34		42	46.041
Guinea	GIN	2020		57.1726	0.777261	12.3073	-0.811861	1053.66		148	43.168
Guinea	GIN	2021	40	53.4671	0.681095	22.6549	-0.808594	1186.38		72	43.541
Guinea	GIN	2022		54.1012	0.728765	21.4103	-0.924852	1390.38	0.21	58	43.846
Guinea	GIN	2023		54.4157	0.806723	18.1328	-0.873512	1605.93		91	44.547
Guinea	GIN	2024					-0.888163			98
Guinea-Bissau	GNB	2000	19	60.7057	0.593385	17.9903	-0.973968	316.946		7	37.509
Guinea-Bissau	GNB	2001		63.4577	0.481344	17.4202		327.138		2	43.949
Guinea-Bissau	GNB	2002		57.3874	0.35467	26.7044	-0.973804	362.034		1	42.99
Guinea-Bissau	GNB	2003		57.5393	0.429815	23.4193	-1.31939	419.785		3	41.275
Guinea-Bissau	GNB	2004		53.8932	0.579716	26.1934	-1.53292	431.376	0.139	2	41.369
Guinea-Bissau	GNB	2005	23	53.0073	0.50891	29.5349	-1.41541	463.073		1	38.897
Guinea-Bissau	GNB	2006		51.3747	0.499845	32.7395	-1.07929	448.513		17	39.24
Guinea-Bissau	GNB	2007		48.0779	0.597805	34.1306	-1.04649	519.07		0	46.032
Guinea-Bissau	GNB	2008		47.6511	0.548978	36.4873	-0.990438	640.21	0.052	2	44.351
Guinea-Bissau	GNB	2009		53.014	0.520024	29.4714	-0.9509	583.19	0.081	8	42.478
Guinea-Bissau	GNB	2010	29	48.0498	0.468075	36.6896	-0.960274	600.194		2	41.704
Guinea-Bissau	GNB	2011		35.8242	0.436906	52.9336	-1.01166	719.54	0.062	1	44.011
Guinea-Bissau	GNB	2012		58.7321	0.504447	28.2116	-1.21311	635.462		7	40.753
Guinea-Bissau	GNB	2013		64.3411	0.551602	24.0648	-1.4129	654.305		3	41.05
Guinea-Bissau	GNB	2014		55.3885	0.5965	36.076	-1.45258	652.022		3	40.203
Guinea-Bissau	GNB	2015	37	66.9221	0.537799	23.4634	-1.39531	645.067	0.198	1	41.798
Guinea-Bissau	GNB	2016		64.5834	0.484643	26.6948	-1.44083	679.665	0.1	0	42.917
Guinea-Bissau	GNB	2017	38	68.4137	0.498389	21.1659	-1.5426	783.123		4	40.504
Guinea-Bissau	GNB	2018		66.9852	0.505274	22.9452	-1.23534	808.532	0.301	0	44.871
Guinea-Bissau	GNB	2019	36	69.6232	0.45878	20.6039	-1.28043	755.44		1	42.392
Guinea-Bissau	GNB	2020		56.6405	1.20049	27.554	-1.28118	755.235	0.191	7	43.27
Guinea-Bissau	GNB	2021	37	61.0092	1.1386	22.7932	-1.38396	836.06	0.22	6	42.937
Guinea-Bissau	GNB	2022		66.2661	1.03818	18.4151	-1.52818	815.715	0.252	13	40.816
Guinea-Bissau	GNB	2023		61.5588	0.938363	25.1414	-1.45173	931.025		10	41.36
Guinea-Bissau	GNB	2024					-1.36761			6
Kenya	KEN	2000	28	47.3314	0.999134	13.8906	-0.843606	594.121		146	40.968
Kenya	KEN	2001		46.3979	1.05907	14.294		591.303		149	43.91
Kenya	KEN	2002		44.6252	1.10949	15.7718	-0.988563	583.205	0.138	168	42.739
Kenya	KEN	2003		45.2912	1.12454	16.7811	-1.10428	635.655		92	43.276
Kenya	KEN	2004		44.469	1.07972	20.4549	-0.721537	656.522		70	45.08
Kenya	KEN	2005	34	45.2266	1.11997	18.9227	-0.72296	734.913		118	43.468
Kenya	KEN	2006		39.1922	1.17933	29.0009	-0.667186	803.92		97	44.887
Kenya	KEN	2007		36.4501	1.27245	29.0033	-0.52394	965.068		270	45.03
Kenya	KEN	2008		34.0974	1.3564	29.0258	-0.619015	1047.24	0.169	271	45.493
Kenya	KEN	2009		31.3753	1.45989	29.5845	-0.602675	1047.97	0.171	96	48.24
Kenya	KEN	2010	44	30.1786	1.56063	28.8049	-0.501483	1091.52	0.171	100	49.758
Kenya	KEN	2011		30.9661	1.60566	26.3225	-0.530936	1096.14	0.177	107	49.677
Kenya	KEN	2012		31.6044	1.62624	24.3108	-0.468612	1285.01	0.184	249	49.247
Kenya	KEN	2013		32.132	1.66091	22.6475	-0.418694	1370.88	0.193	378	49.242
Kenya	KEN	2014		29.2218	1.83768	20.0193	-0.415559	1482.82	0.199	253	51.866
Kenya	KEN	2015	50	26.898	1.92388	17.9206	-0.367567	1489.12		159	55.106
Kenya	KEN	2016		24.9997	2.03529	16.2062	-0.31658	1554.13		151	55.65
Kenya	KEN	2017	52	23.2806	1.71156	21.0867	-0.303305	1667.48		493	53.885
Kenya	KEN	2018		23.3651	1.76707	22.1549	-0.344954	1836.45	0.16	381	52.682
Kenya	KEN	2019	51	24.2998	2.00871	18.51	-0.291442	1960.41		278	56.03
Kenya	KEN	2020		23.3325	2.21009	17.1618	-0.375971	1927.49	0.074	326	55.154
Kenya	KEN	2021	53	22.652	2.22921	18.5484	-0.346807	2061.36	0.098	391	56.57
Kenya	KEN	2022		24.0099	2.00364	19.0173	-0.33248	2109.56	0.236	996	52.483
Kenya	KEN	2023		24.2457	1.95431	20.1371	-0.313111	1952.3	0.289	1108	51.715
Kenya	KEN	2024					-0.29789			1086
Lesotho	LSO	2000	27	39.7274	2.90852	3.86586	0.236936	459.847		0	60.062
Lesotho	LSO	2001		28.3872	3.60629	6.78146		428.197		0	68.058
Lesotho	LSO	2002		30.1359	3.18395	7.82913	0.268671	395.854		2	65.246
Lesotho	LSO	2003		32.4659	3.14435	8.62416	0.256284	599.941	0.045	2	65.801
Lesotho	LSO	2004		31.5007	2.99281	11.4564	-0.405834	785.054		1	63.368
Lesotho	LSO	2005	33	34.3876	2.25555	17.3604	-0.247119	891.367		0	58.249
Lesotho	LSO	2006		30.0232	3.0488	13.5732	-0.479045	919.059		3	62.174
Lesotho	LSO	2007		24.052	4.63974	11.7081	-0.52004	911.093		1	68.832
Lesotho	LSO	2008		22.0141	4.36958	20.99	-0.483948	900.897		0	68.068
Lesotho	LSO	2009		19.7205	4.8654	25.9356	-0.333371	902.751		2	67.365
Lesotho	LSO	2010	45	23.4602	3.98162	22.7694	-0.35215	1159.77	0.069	1	64.661
Lesotho	LSO	2011		18.8037	4.93364	26.3468	-0.375385	1308.19		0	70.737
Lesotho	LSO	2012		16.8902	5.62559	26.7751	-0.443057	1255.54		15	66.969
Lesotho	LSO	2013		13.9333	6.12028	30.3258	-0.452242	1196.33		0	73.153
Lesotho	LSO	2014		14.1902	5.80805	27.6609	-0.498818	1213.58		3	70.047
Lesotho	LSO	2015	54	15.609	5.62011	23.6514	-0.56995	1130.47		5	68.555
Lesotho	LSO	2016		15.8379	5.59335	23.3479	-0.620941	989.544		5	68.047
Lesotho	LSO	2017	56	15.7754	6.03924	26.8696	-0.633024	1096.28		2	70.065
Lesotho	LSO	2018		14.499	5.59544	35.2111	-0.631831	1176.81	0.457	0	69.745
Lesotho	LSO	2019	53	7.2935	6.75438	61.898	-0.674418	1076.2		6	64.383
Lesotho	LSO	2020		16.0208	4.87197	37.171	-0.708581	930.457		11	61.309
Lesotho	LSO	2021	53	14.6682	4.38429	44.2098	-0.713605	1086.27		13	59.993
Lesotho	LSO	2022		12.7523	6.55055	36.4513	-0.747926	1033.88	0.235	15	65.897
Lesotho	LSO	2023		13.1971	5.84428	40.4632	-0.750318	972.42		11	63.535
Lesotho	LSO	2024					-0.647089			8
Liberia	LBR	2000	20	69.6022	0.64588	0	-2.03212	294.729		80	31.058
Liberia	LBR	2001		57.2975	0.531865	10.1444		299.801		166	37.858
Liberia	LBR	2002		53.5794	0.564013	12.478	-1.64907	304.706		138	35.245
Liberia	LBR	2003		57.1681	0.417149	19.6151	-1.65576	228.88		229	30.709
Liberia	LBR	2004		73.4943	0.517041	14.876	-1.66108	284.14	0.033	17	34.237
Liberia	LBR	2005	23	67.0809	0.545387	22.2289	-1.66171	285.973		18	31.78
Liberia	LBR	2006		64.5121	0.471916	24.393	-1.30702	317.693		15	36.266
Liberia	LBR	2007		42.2231	0.73448	36.7815	-1.32656	366.307		5	41.023
Liberia	LBR	2008		34.8446	0.919022	46.8541	-1.21554	438.628	0.013	9	40.988
Liberia	LBR	2009		39.7145	1.19803	43.1856	-1.10465	447.626	0.023	6	42.784
Liberia	LBR	2010	33	42.703	1.2732	38.5775	-1.02327	484.369	0.022	6	42.635
Liberia	LBR	2011		40.3081	1.51829	38.4519	-0.997842	554.348		17	43.887
Liberia	LBR	2012		41.8024	1.55077	33.9503	-0.881558	611.702		3	48.407
Liberia	LBR	2013		40.0726	0.317446	51.585	-1.12319	680.948		13	38.678
Liberia	LBR	2014		44.7535	0.823582	41.7365	-1.11502	676.994		35	39.301
Liberia	LBR	2015	37	45.3021	1.20421	35.0588	-1.20267	663.6	0.036	13	42.546
Liberia	LBR	2016		46.7549	1.39316	30.6519	-1.15767	684.665	0.049	24	43.195
Liberia	LBR	2017	40	44.1189	1.38746	33.7835	-1.15792	684.894	0.051	22	43.507
Liberia	LBR	2018		42.3698	1.68726	33.723	-1.19772	660.097	0.14	12	45.093
Liberia	LBR	2019	43	54.6737	1.35628	24.6701	-1.28623	610.66	0.145	23	43.01
Liberia	LBR	2020		63.2178	1.32303	18.0606	-1.37543	589.77	0.151	47	39.559
Liberia	LBR	2021	45	61.6716	1.11088	21.6968	-1.32722	667.196	0.169	15	43.004
Liberia	LBR	2022		62.2874	1.29002	19.8839	-1.3316	739.584	0.178	28	41.198
Liberia	LBR	2023		63.2389	1.30093	18.2884	-1.21531	799.194		27	42.272
Liberia	LBR	2024					-1.24629			13
Madagascar	MDG	2000	17	43.3156	1.84589	1.74311	-0.973968	280.283		2	46.968
Madagascar	MDG	2001		38.7747	1.83292	8.46727		319.283	0.087	1	57.076
Madagascar	MDG	2002		37.5774	1.7471	19.7594	-0.50797	304.942	0.13	29	48.498
Madagascar	MDG	2003		34.5289	2.17279	9.99499	-0.878102	352.62	0.141	8	53.183
Madagascar	MDG	2004		30.5816	2.17331	21.576	-0.675701	272.201	0.149	18	50.252
Madagascar	MDG	2005	21	33.0271	1.9345	23.2328	-0.566499	305.812	0.172	8	46.091
Madagascar	MDG	2006		31.6536	1.89314	24.3411	-0.584279	324.147	0.163	7	51.433
Madagascar	MDG	2007		32.6549	1.90437	16.2107	-0.451733	419.548	0.173	11	53.711
Madagascar	MDG	2008		37.189	1.41036	20.0972	-0.516484	512.58	0.178	1	54.505
Madagascar	MDG	2009		37.6556	1.30581	24.765	-0.538952	446.315	0.173	30	47.342
Madagascar	MDG	2010	25	36.1504	1.86784	15.7976	-0.656467	450.009	0.186	9	48.177
Madagascar	MDG	2011		27.9733	1.67813	26.1196	-0.741896	506.164	0.137	2	53.806
Madagascar	MDG	2012		32.4887	1.48979	19.1981	-0.908933	493.511	0.136	45	47.75
Madagascar	MDG	2013		35.5883	1.30426	20.2925	-0.931553	515.302	0.146	51	46.224
Madagascar	MDG	2014		28.1669	1.74814	24.9541	-0.992259	505.685	0.173	72	46.819
Madagascar	MDG	2015	29	25.1729	1.99011	28.2015	-0.999533	445.32		55	44.64
Madagascar	MDG	2016		23.0576	2.37195	26.0611	-0.835565	453.971		56	50.071
Madagascar	MDG	2017	30	25.6345	2.24615	22.9272	-0.819978	491.867		141	45.807
Madagascar	MDG	2018		29.3277	1.49675	29.8801	-0.887709	500.457	0.195	78	45.248
Madagascar	MDG	2019	33	34.2247	0.68269	38.1874	-0.867749	499.819		251	37.774
Madagascar	MDG	2020		30.9384	0.689885	45.6027	-0.906914	450.772		235	37.038
Madagascar	MDG	2021	35	32.7116	0.7474	40.4522	-0.945883	483.469		217	38.019
Madagascar	MDG	2022		30.4191	0.895822	34.994	-0.918224	503.515	0.172	225	40.298
Madagascar	MDG	2023		27.4221	0.987975	38.1488	-0.954824	508.718		488	38.832
Madagascar	MDG	2024					-0.863193			476
Malawi	MWI	2000	22	16.763	1.01542	36.8903	-0.605915	376.185		8	45.081
Malawi	MWI	2001		18.5471	0.836593	37.328		360.388		15	47.316
Malawi	MWI	2002		14.9899	0.974936	46.0186	-1.00052	414.277		8	46.393
Malawi	MWI	2003		12.0709	1.17514	45.8796	-1.13313	370.929	0.021	7	46.714
Malawi	MWI	2004		9.69993	0.857722	66.0718	-0.978206	391.551	0.021	2	44.937
Malawi	MWI	2005	28	9.09982	1.05275	62.4583	-0.942374	400.893		2	43.71
Malawi	MWI	2006		8.92417	0.943711	62.6096	-0.86167	426.501		2	46.903
Malawi	MWI	2007		11.7152	0.734581	65.2698	-0.804433	459.738		3	45.233
Malawi	MWI	2008		10.3703	1.36748	57.1692	-0.655206	536.049	0.018	4	49.618
Malawi	MWI	2009		11.2356	1.05576	62.124	-0.551895	605.526	0.018	3	48.953
Malawi	MWI	2010	38	10.9277	1.13197	62.7652	-0.542683	660.93		2	48.842
Malawi	MWI	2011		8.96164	1.15239	64.4184	-0.583996	738.263		16	46.876
Malawi	MWI	2012		10.2416	0.956429	70.7882	-0.576227	540.313		4	46.145
Malawi	MWI	2013		6.70596	1.48205	68.2518	-0.570424	480.801	0.012	7	47.453
Malawi	MWI	2014		8.18289	1.56811	63.036	-0.542739	512.305		16	47.378
Malawi	MWI	2015	42	10.9819	1.89914	53.5009	-0.585503	527.594		20	49.043
Malawi	MWI	2016		12.415	1.91102	53.7135	-0.608953	440.411	0.031	23	47.878
Malawi	MWI	2017	48	12.6952	1.7192	59.8552	-0.578222	495.77		28	47.871
Malawi	MWI	2018		12.8012	1.68876	57.3638	-0.633709	533.281	0.15	29	46.543
Malawi	MWI	2019	48	11.8542	1.5333	54.5132	-0.686037	579.497		29	48.512
Malawi	MWI	2020		12.5076	1.56225	55.2415	-0.748416	602.092	0.049	113	44.002
Malawi	MWI	2021	48	11.5369	1.36147	61.0719	-0.679764	617.447		101	45.198
Malawi	MWI	2022		12.5849	0.876976	64.0489	-0.781456	604.27	0.054	86	40.773
Malawi	MWI	2023		12.0029	0.837625	65.5047	-0.768541	631.51		93	40.542
Malawi	MWI	2024					-0.72576			75
Mali	MLI	2000	20	68.8169	1.29322	5.79892	-1.35773	256.2	0.044	3	38.952
Mali	MLI	2001		67.7932	1.05405	6.87188		291.16		4	45.673
Mali	MLI	2002		61.7514	1.10984	14.1923	-0.81079	318.042		1	47.042
Mali	MLI	2003		61.2019	1.41244	8.92349	-1.0757	371.627		3	46.884
Mali	MLI	2004		55.613	1.58851	12.0928	-1.00022	416.278	0.055	3	48.521
Mali	MLI	2005	24	57.0182	1.39721	14.2014	-0.887585	461.458	0.06	1	45.363
Mali	MLI	2006		56.7429	1.22406	19.0658	-0.916796	493.629	0.057	7	45.545
Mali	MLI	2007		61.3473	0.996716	17.8454	-0.864003	564.158	0.06	9	44.581
Mali	MLI	2008		63.222	0.713734	20.637	-0.8339	660.726	0.063	21	42.058
Mali	MLI	2009		61.8352	0.665686	23.5487	-0.804819	664.728	0.116	9	43.275
Mali	MLI	2010	35	56.266	0.668931	27.3523	-0.924434	670.369	0.096	14	41.572
Mali	MLI	2011		50.0025	0.604765	32.5442	-0.822192	789.063	0.111	19	42.738
Mali	MLI	2012		44.7436	0.413522	41.6655	-0.910093	733.739	0.101	172	36.571
Mali	MLI	2013		34.8494	0.815838	42.1065	-0.852958	758.476	0.113	236	39.262
Mali	MLI	2014		33.5512	0.891738	44.3446	-1.04997	797.178	0.097	116	39.77
Mali	MLI	2015	36	34.1712	0.919274	41.3154	-0.938338	704.825	0.094	155	39.833
Mali	MLI	2016		35.7506	1.20877	30.2279	-0.929614	730.856	0.117	144	43.023
Mali	MLI	2017	38	37.5024	1.17751	28.6253	-0.871988	775.522	0.113	415	41.507
Mali	MLI	2018		32.5535	1.15119	34.9958	-0.978989	835.085	0.12	585	40.021
Mali	MLI	2019	40	31.0792	1.11927	15.9805	-1.09543	820.197		600	43.839
Mali	MLI	2020		44.7371	1.4027	6.23198	-1.12241	804.342		1006	42.432
Mali	MLI	2021	41	44.094	1.35538	8.18318	-1.18108	862.467		1025	42.635
Mali	MLI	2022		50.8474	1.36568	3.34899	-1.20602	835.503	0.191	1360	40.852
Mali	MLI	2023		47.2299	1.34937	5.98706	-1.22588	891.129	0.188	1592	40.788
Mali	MLI	2024					-1.28714			1488
Mauritania	MRT	2000	21	77.821	0.469694	4.35133	-0.279372	680.912		1	44.601
Mauritania	MRT	2001		77.1258	0.5451	3.87626		651.811		0	49.51
Mauritania	MRT	2002		69.9847	0.873266	4.94126	-0.279121	648.885		0	53.062
Mauritania	MRT	2003		68.3899	0.771997	9.2804	-0.291973	732.013		6	48.807
Mauritania	MRT	2004		70.4869	0.706549	7.08078	-0.579192	849.63	0.109	0	51.472
Mauritania	MRT	2005	25	67.1342	0.819559	5.26137	-0.677453	999.24		5	45.484
Mauritania	MRT	2006		68.1598	0.676197	2.506	-0.851616	1300.61		0	52.865
Mauritania	MRT	2007		65.2989	0.763878	4.1853	-0.767354	1405.15		3	51.318
Mauritania	MRT	2008		60.9404	0.887767	5.18898	-0.934694	1635.56		7	50.622
Mauritania	MRT	2009		62.7652	0.878855	5.24781	-0.763299	1435.43	0.136	7	50.649
Mauritania	MRT	2010	32	62.6361	0.731502	5.91368	-0.515375	1659.96	0.161	5	49.625
Mauritania	MRT	2011		58.3761	0.74975	5.34054	-0.505274	1931.2		8	53.219
Mauritania	MRT	2012		55.428	0.89774	5.29263	-0.650422	1859.12		7	53.57
Mauritania	MRT	2013		50.2085	1.08288	8.92682	-0.830783	1934.25		9	53.112
Mauritania	MRT	2014		47.6208	1.25234	10.2927	-0.845637	1713.01	0.162	5	54.275
Mauritania	MRT	2015	33	47.742	1.41884	8.63765	-0.931371	1554.95	0.175	6	51.178
Mauritania	MRT	2016		55.7447	1.19935	2.28802	-0.895438	1565.76		4	54.016
Mauritania	MRT	2017	39	54.0633	1.23123	6.47614	-0.820666	1615	0.188	7	51.779
Mauritania	MRT	2018		64.95	0.910965	2.25896	-0.834364	1722.94	0.196	4	52.066
Mauritania	MRT	2019	36	60.293	1.10124	3.1753	-0.824074	1767.07	0.201	4	51.366
Mauritania	MRT	2020		61.5132	1.00379	4.12542	-0.900801	1795.77	0.203	12	50.564
Mauritania	MRT	2021	40	48.1911	1.497	9.30824	-0.84829	1947.79	0.219	5	53.944
Mauritania	MRT	2022		41.7148	1.70581	19.315	-0.87695	1960.35	0.261	7	54.407
Mauritania	MRT	2023		43.7737	1.48362	19.481	-0.818758	2120.82		9	53.522
Mauritania	MRT	2024					-0.741247			12
Mauritius	MUS	2000	49	44.0001	1.52947	0.302352	0.414259	4056.15	0.888		63.568
Mauritius	MUS	2001		43.8198	1.57129	0.563884		3982.9	0.903		60.679
Mauritius	MUS	2002		44.8716	1.68696	0.309192	0.578387	4151.38	0.961		65.738
Mauritius	MUS	2003		45.3222	1.66883	0.11157	0.588314	4955.48	0.944		66.376
Mauritius	MUS	2004		43.4229	1.80295	0.0297715	0.571632	5570.39	1.043		67.614
Mauritius	MUS	2005	53	49.5881	1.69516	0.0394255	0.607791	5461.68	1.068		65.886
Mauritius	MUS	2006		52.913	1.61826	0.0813216	0.61043	5636.62	1.108		65.033
Mauritius	MUS	2007		55.8085	1.47312	0.165689	0.611037	6506.31	1.123		64.442
Mauritius	MUS	2008		61.8415	1.38968	0.917557	0.830388	7943.34	1.138		64.634
Mauritius	MUS	2009		58.3733	1.57989	1.7464	0.796226	7233.74	1.153		65.26
Mauritius	MUS	2010	59	52.3169	1.99485	1.88307	0.733344	7903.85	1.169		69.083
Mauritius	MUS	2011		53.0715	1.74817	3.92855	0.746775	9075.49	1.407		67.078
Mauritius	MUS	2012		51.6132	1.87548	2.16398	0.98957	9173.19	1.336		69.755
Mauritius	MUS	2013		53.1803	1.93168	1.41865	0.926244	9522.18	1.585		69.502
Mauritius	MUS	2014		50.1802	2.42503	0.457589	1.05263	10119.3	1.88		72.94
Mauritius	MUS	2015	67	49.5767	2.31317	2.599	1.05924	9291.59	1.973		74.51
Mauritius	MUS	2016		48.1608	2.44511	0.226009	1.10054	9749.28	2.144		73.688
Mauritius	MUS	2017	68	47.3969	2.47479	0.502383	1.02885	10625.2	2.268		76.343
Mauritius	MUS	2018		46.9196	2.48201	0.502884	0.93361	11433.3	1.858		73.652
Mauritius	MUS	2019	68	47.1264	2.50442	0.156689	0.859578	11223.4	2.558		75.879
Mauritius	MUS	2020		43.5847	2.93307	0.205926	0.831914	8890.2	2.689	17	73.035
Mauritius	MUS	2021	66	40.4167	3.35773	1.33153	0.738763	8974.79		22	75.353
Mauritius	MUS	2022		44.0131	2.52426	4.56898	0.73196	10114.8	1.436	31	69.822
Mauritius	MUS	2023		45.2427	2.4671	1.96571	0.823778	11072		13	72.322
Mauritius	MUS	2024					0.765353			30
Mozambique	MOZ	2000	20	38.8812	1.08605	9.4746	-0.609052	327.126	0.024	5	46.224
Mozambique	MOZ	2001		26.6876	1.31183	25.7477		304.793		0	55.446
Mozambique	MOZ	2002		27.9824	1.17594	34.4725	-0.789039	313.887		2	48.987
Mozambique	MOZ	2003		21.2151	1.17537	42.0013	-1.01366	339.488		14	44.799
Mozambique	MOZ	2004		15.6063	1.1223	52.0271	-0.799164	400.057	0.026	25	44.215
Mozambique	MOZ	2005	23	12.3185	1.42611	53.2457	-0.746992	436.773		8	43.782
Mozambique	MOZ	2006		12.7469	1.14244	57.6572	-0.670594	457.487	0.026	7	46.981
Mozambique	MOZ	2007		12.0195	1.17218	56.0282	-0.597232	507.875		8	48.028
Mozambique	MOZ	2008		11.2034	1.20705	58.274	-0.578587	592.16		10	48.01
Mozambique	MOZ	2009		8.23776	1.27559	65.1905	-0.447561	547.698	0.047	30	45.721
Mozambique	MOZ	2010	31	7.11212	1.24371	68.0009	-0.648056	496.186	0.05	16	43.123
Mozambique	MOZ	2011		6.71954	1.25546	66.1441	-0.702558	618.176	0.054	8	47.268
Mozambique	MOZ	2012		5.55483	1.23553	58.3866	-0.557708	685.686	0.056	20	48.537
Mozambique	MOZ	2013		8.01704	1.49877	58.5629	-0.543743	686.506	0.058	69	46.425
Mozambique	MOZ	2014		10.4245	1.71541	53.9691	-0.571643	697.142		107	46.536
Mozambique	MOZ	2015	40	11.2615	1.78663	54.6839	-0.580096	610.563		22	48.373
Mozambique	MOZ	2016		10.5391	1.72313	59.1432	-0.682352	441.49		97	43.579
Mozambique	MOZ	2017	43	9.68615	1.73678	62.1142	-0.689896	470.938	0.077	87	44.456
Mozambique	MOZ	2018		9.32623	1.78635	62.4668	-0.68712	517.507	0.085	106	43.599
Mozambique	MOZ	2019	43	9.71003	1.82605	61.3059	-0.650047	519.092	0.086	304	43.19
Mozambique	MOZ	2020		10.3067	2.39178	51.8741	-0.822344	462.434	0.084	551	42.976
Mozambique	MOZ	2021	44	9.4462	2.28473	58.7673	-0.818585	509.908	0.082	409	43.644
Mozambique	MOZ	2022		10.4033	2.28882	56.2202	-0.770682	578.252	0.175	496	42.963
Mozambique	MOZ	2023		10.3707	2.24919	57.7107	-0.777969	622.986		231	44.22
Mozambique	MOZ	2024					-0.715793			408
Namibia	NAM	2000	39	6.53394	5.61938	4.92341	0.469872	2165.66		61	72.605
Namibia	NAM	2001		6.67434	5.7319	5.29597		1925.05		17	79.262
Namibia	NAM	2002		6.33943	5.9247	5.40582	0.139743	1792.82		5	80.327
Namibia	NAM	2003		6.60595	6.0618	5.62483	0.168386	2593.84		3	82.69
Namibia	NAM	2004		6.02108	5.69723	12.9651	0.104889	3430.86	0.308	0	83.591
Namibia	NAM	2005	49	5.76928	5.24644	19.3029	0.0443144	3715.46		0	78.021
Namibia	NAM	2006		5.59942	5.04456	22.4266	0.276504	3871.24		2	79.182
Namibia	NAM	2007		5.44637	5.38635	18.4782	0.296043	4324.65	0.383	3	80.81
Namibia	NAM	2008		6.40921	4.89047	20.1089	0.372845	4150.6		7	77.955
Namibia	NAM	2009		7.75815	4.31239	17.792	0.473297	4248.12		2	79.192
Namibia	NAM	2010	57	8.49479	4.88263	13.0548	0.241229	5340.88		3	79.275
Namibia	NAM	2011		9.32708	5.12085	9.86617	0.189385	5751		6	80.521
Namibia	NAM	2012		9.90652	4.80754	7.20474	0.397893	5942.67		1	83.737
Namibia	NAM	2013		8.88373	5.20561	5.78569	0.335436	5346.62		12	80.993
Namibia	NAM	2014		9.03689	5.00115	6.02458	0.316468	5378.33		15	79.929
Namibia	NAM	2015	63	7.32915	5.39399	5.71121	0.292767	4774.12		6	82.232
Namibia	NAM	2016		7.71209	5.76429	6.97084	0.234955	4395.7		8	81.935
Namibia	NAM	2017	63	7.80559	5.34107	6.64371	0.2684	5140.91	0.567	4	82.523
Namibia	NAM	2018		7.78356	5.16181	7.94251	0.313609	5308.61	0.335	1	84.103
Namibia	NAM	2019	62	7.52685	5.26885	9.29205	0.286785	4731.83	0.368	3	81.925
Namibia	NAM	2020		6.96857	6.51413	2.94306	0.149886	3878.59	0.38	6	84.458
Namibia	NAM	2021	63	7.28052	6.51885	7.42926	0.15962	4412.83	0.42	18	81.9
Namibia	NAM	2022		7.5487	5.80618	9.64817	0.165395	4349.8	0.553	11	80.57
Namibia	NAM	2023		7.49171	5.54814	11.3845	0.153939	4187.61		6	80.423
Namibia	NAM	2024					0.0993431			8
Niger	NER	2000	15	60.3311	1.13	9.26675	-1.31116	194.137		1	38.885
Niger	NER	2001		60.2555	1.14577	9.34281		204.817		4	45.765
Niger	NER	2002		59.4518	1.20737	9.4469	-1.0454	224.652	0.033	38	40.762
Niger	NER	2003		61.0829	1.07095	10.1347	-1.05209	264.363		3	44.809
Niger	NER	2004		59.8335	1.18102	10.2943	-0.835453	282.508	0.022	15	43.94
Niger	NER	2005	19	51.3445	1.92018	10.6248	-0.744178	317.676		4	45.061
Niger	NER	2006		49.8872	2.05841	10.5225	-0.806225	332.39		2	51.964
Niger	NER	2007		53.6588	1.50169	13.1055	-0.818	386.104		28	45.349
Niger	NER	2008		52.612	1.55049	12.3519	-0.745134	473.875	0.019	22	47.316
Niger	NER	2009		53.668	1.53778	11.96	-0.682744	459.853	0.028	6	49.648
Niger	NER	2010	30	55.5338	1.31194	12.3103	-0.735001	473.238		7	45.566
Niger	NER	2011		57.7374	1.2723	10.7341	-0.695647	509.748		7	48.443
Niger	NER	2012		60.8065	1.03994	13.1739	-0.589872	527.354	0.053	7	47.365
Niger	NER	2013		56.5437	1.34045	11.8497	-0.637481	551.084	0.051	11	48.383
Niger	NER	2014		54.6735	1.27713	13.2566	-0.588792	563.454	0.027	11	48.618
Niger	NER	2015	32	51.6856	1.11163	24.5555	-0.590857	485.633	0.032	55	41.509
Niger	NER	2016		58.5104	1.10086	14.7612	-0.566044	500.503	0.033	60	43.697
Niger	NER	2017	33	48.3137	1.88514	14.4769	-0.654903	521.804	0.022	41	46.202
Niger	NER	2018		48.9612	1.76658	11.8096	-0.612738	577.277	0.037	112	46.956
Niger	NER	2019	34	46.0953	2.02237	15.2488	-0.664651	562.864	0.039	270	44.067
Niger	NER	2020		43.5486	2.31366	15.74	-0.657381	579.492	0.035	432	45.788
Niger	NER	2021	35	42.5277	2.12212	14.2932	-0.639505	608.718		328	45.3
Niger	NER	2022		40.3408	1.53497	18.1579	-0.644957	609.379	0.028	578	43.65
Niger	NER	2023		51.4802	0.971963	14.5821	-0.611529	642.462	0.038	442	41.616
Niger	NER	2024					-0.769666			455
Nigeria	NGA	2000	20	60.1621	0.585594	16.9676	-1.2673	536.654	0.269	142	33.474
Nigeria	NGA	2001		60.7478	0.857693	6.71516		563.12		108	42.317
Nigeria	NGA	2002		65.0492	0.531332	7.30479	-1.52643	704.138		139	37.277
Nigeria	NGA	2003		72.8144	0.929829	5.71532	-1.37272	750.244	0.255	183	37.492
Nigeria	NGA	2004		64.5479	1.20203	6.2207	-1.09171	924.059		202	41.619
Nigeria	NGA	2005	24	65.9705	1.14133	5.44647	-1.08978	1169.82	0.27	114	39.941
Nigeria	NGA	2006		70.4588	0.901867	5.40905	-1.04546	1494.47	0.333	108	42.84
Nigeria	NGA	2007		70.9375	0.778612	5.90034	-0.955905	1711.18	0.361	184	42.206
Nigeria	NGA	2008		72.7569	0.660599	6.06479	-1.0168	2095.63	0.359	177	41.941
Nigeria	NGA	2009		74.4749	0.570012	6.21556	-1.12034	1835.6	0.36	163	40.546
Nigeria	NGA	2010	34	76.8775	0.44847	6.2574	-1.1376	2214.7		329	38.507
Nigeria	NGA	2011		74.7251	0.479377	7.85745	-1.12144	2416.23		283	39.758
Nigeria	NGA	2012		72.8443	0.544367	8.41891	-0.969914	2616.05		691	39.486
Nigeria	NGA	2013		70.9267	0.489278	12.4429	-0.981981	2844.33	0.363	739	38.964
Nigeria	NGA	2014		71.8542	0.445932	12.2797	-1.05491	3058.14		959	38.077
Nigeria	NGA	2015	39	71.8901	0.589078	9.91574	-0.913884	2593.9		955	39.768
Nigeria	NGA	2016		75.187	0.474969	10.3171	-0.919166	2070.41	0.428	792	37.668
Nigeria	NGA	2017	39	77.3879	0.532663	7.59491	-0.860866	1876.34		952	38.449
Nigeria	NGA	2018		75.9458	0.497548	7.16919	-0.845838	2057.87	0.364	1401	37.494
Nigeria	NGA	2019	43	71.497	0.469804	11.7465	-0.967848	2265.15	0.356	1634	38.65
Nigeria	NGA	2020		74.6758	0.505979	9.58338	-0.984177	2008.91		2854	35.127
Nigeria	NGA	2021	38	76.2434	0.541028	7.86406	-1.05006	2008.54	0.386	3528	35.623
Nigeria	NGA	2022		75.7379	0.619522	6.95062	-1.05685	2128.87	0.386	3730	35.069
Nigeria	NGA	2023		71.9048	0.600933	11.2784	-0.867754	1594.42	0.38	3549	34.972
Nigeria	NGA	2024					-1.00659			4400
Rwanda	RWA	2000	19	26.5873	0.646269	46.4013	-1.31199	251.801		18	34.829
Rwanda	RWA	2001		27.6767	0.698044	40.7232		237.258		27	40.909
Rwanda	RWA	2002		28.4643	0.757934	35.1172	-1.41875	234.151	0.019	3	43.067
Rwanda	RWA	2003		17.12	2.30381	42.4374	-1.42799	249.092		3	47.802
Rwanda	RWA	2004		21.2193	1.92856	47.2468	-0.700831	269.481	0.049	2	49.452
Rwanda	RWA	2005	26	23.8001	1.61428	50.2707	-0.730966	324.106	0.024	3	43.982
Rwanda	RWA	2006		14.2659	1.48206	57.0494	-0.369433	357.081		7	48.345
Rwanda	RWA	2007		12.4901	1.74628	55.7436	-0.372543	426.161		17	48.644
Rwanda	RWA	2008		11.7869	1.81384	53.5247	-0.244627	528.402	0.052	6	52.574
Rwanda	RWA	2009		11.3808	1.88107	53.4219	-0.235425	564.092	0.055	13	51.775
Rwanda	RWA	2010	39	11.0913	2.03922	52.4158	-0.132929	593.536	0.055	49	49.688
Rwanda	RWA	2011		10.7957	2.1974	49.9072	-0.119651	651.124	0.0129	39	52.46
Rwanda	RWA	2012		10.1784	2.05491	53.7934	-0.0899578	706.775		38	51.867
Rwanda	RWA	2013		12.3073	2.17188	44.7748	-0.0092551	704.97	0.1	14	55.872
Rwanda	RWA	2014		12.0553	2.19319	47.6033	-0.0403257	725.011	0.089	6	56.772
Rwanda	RWA	2015	44	12.182	2.10472	42.754	-0.0496198	733.962	0.11	5	56.948
Rwanda	RWA	2016		13.2436	1.566	51.0234	0.120243	729.48	0.12	7	54.808
Rwanda	RWA	2017	48	14.0487	1.56329	46.754	0.316719	758.278	0.135	4	57.59
Rwanda	RWA	2018		11.5055	1.64325	48.1221	0.277238	771.761	0.132	24	54.749
Rwanda	RWA	2019	47	10.0782	1.76991	43.1132	0.228952	810.082	0.117	50	55.15
Rwanda	RWA	2020		7.20577	2.13854	46.2654	0.260614	778.679	0.116	40	56.241
Rwanda	RWA	2021	49	5	2.63612	40	0.210283	828.805	0.121	29	59.746
Rwanda	RWA	2022		4.2	2.4324	43	0.368448	975.487	0.09	23	60.57
Rwanda	RWA	2023		4.1	2.41123	37	0.408666	1027.02		15	62.959
Rwanda	RWA	2024					0.348908			14
Sao Tome and Principe	STP	2000	33	43.841	3.51259	16.3665	-0.795679	532.635			48.317
Sao Tome and Principe	STP	2001		43.6209	3.70773	15.8284		489.081			53.613
Sao Tome and Principe	STP	2002		41.911	3.77631	16.08	-0.795428	532.83			52.437
Sao Tome and Principe	STP	2003		31.9226	6.05495	13.3301	-0.80828	621.092			62.884
Sao Tome and Principe	STP	2004		35.2791	5.1878	14.256	-0.825202	662.762	0.514		59.398
Sao Tome and Principe	STP	2005	37	33.3951	5.03137	15.9301	-0.913926	774.06			55.966
Sao Tome and Principe	STP	2006		39.9042	0.549278	48.7396	-1.01898	805.056			35.221
Sao Tome and Principe	STP	2007		35.3324	1.66425	37.338	-0.884344	852.349			43.595
Sao Tome and Principe	STP	2008		30.2322	1.22299	44.8651	-0.781319	1081.86			43.137
Sao Tome and Principe	STP	2009		27.4015	1.59042	40.6757	-0.777526	1128.44			46.176
Sao Tome and Principe	STP	2010	47	25.6959	2.11927	34.5518	-0.816785	1049.33			50.385
Sao Tome and Principe	STP	2011		23.7933	2.29883	32.1965	-0.745474	1229.03			51.853
Sao Tome and Principe	STP	2012		17.7958	2.30571	46.8334	-0.784788	1220			49.326
Sao Tome and Principe	STP	2013		14.2435	2.99635	49.8034	-0.843715	1393.55			51.658
Sao Tome and Principe	STP	2014		15.0418	2.79644	47.6544	-0.734745	1499.9			52.355
Sao Tome and Principe	STP	2015	52	16.0181	2.0531	51.329	-0.658229	1307.02	0.315		51.411
Sao Tome and Principe	STP	2016		13.9136	3.06471	43.8859	-0.596544	1443.43			55.068
Sao Tome and Principe	STP	2017	55	14.7573	3.43654	37.9064	-0.545734	1568.08			59.898
Sao Tome and Principe	STP	2018		15.8169	2.62429	37.2122	-0.38123	1839.25			57.229
Sao Tome and Principe	STP	2019	60	16.9912	2.23238	40.3422	-0.45934	1949.88	0.492		58.374
Sao Tome and Principe	STP	2020		11.8476	2.96808	45.7651	-0.488719	2183.53		0	64.218
Sao Tome and Principe	STP	2021	59	11.6557	3.36913	43.6936	-0.592223	2380.3		2	65.018
Sao Tome and Principe	STP	2022		15.2078	2.31202	42.3471	-0.650509	2407.63	0.464	2	60.039
Sao Tome and Principe	STP	2023		16.6631	2.13395	43.9212	-0.676728	2963		1	60.29
Sao Tome and Principe	STP	2024					-0.718674			1
Senegal	SEN	2000	21	55.6688	1.25274	3.9798	-0.576228	603.233		49	43.27
Senegal	SEN	2001		52.7637	1.41577	3.59411		637.214		53	48.809
Senegal	SEN	2002		55.3296	1.33994	5.00747	-0.540262	669.43		38	48.939
Senegal	SEN	2003		54.9306	1.54447	2.92785	-0.753493	817.888		15	51.268
Senegal	SEN	2004		55.0914	1.62705	2.14929	-0.624764	918.102	0.054	7	53.953
Senegal	SEN	2005	25	39.516	1.59511	6.60517	-0.539867	979.846		1	54.002
Senegal	SEN	2006		37.4395	1.75945	5.43387	-0.523939	1017.2		22	55.953
Senegal	SEN	2007		44.2726	1.31881	5.81684	-0.44342	1188.94		19	54.575
Senegal	SEN	2008		41.6278	1.38714	6.4813	-0.268235	1398.79	0.062	11	57.518
Senegal	SEN	2009		45.6154	1.40656	6.78883	-0.341083	1308.69		19	55.139
Senegal	SEN	2010	37	48.6773	1.1616	12.3207	-0.285544	1275.88		14	51.645
Senegal	SEN	2011		50.7988	1.30862	8.53314	-0.250523	1374.68		17	54.293
Senegal	SEN	2012		52.7739	1.21923	9.34162	-0.23996	1326.84		23	52.887
Senegal	SEN	2013		55.2388	1.17077	9.42252	-0.180535	1379.83	0.3179	18	53.124
Senegal	SEN	2014		50.3756	1.08004	18.3747	-0.124211	1398.89		42	50.734
Senegal	SEN	2015	45	50.8387	1.07821	18.0041	-0.162713	1218.01	0.2074	16	52.033
Senegal	SEN	2016		51.141	1.06802	17.3509	-0.184756	1266.44	0.077	18	51.708
Senegal	SEN	2017	49	48.8957	1.01061	18.3399	-0.029733	1356.81	0.069	12	54.366
Senegal	SEN	2018		48.3354	1.11894	20.3944	-0.0860241	1452.56		13	53.277
Senegal	SEN	2019	51	48.7466	1.05769	19.2778	0.124428	1431.2	0.088	4	57.146
Senegal	SEN	2020		41.573	1.72162	16.8089	0.0852361	1459.18	0.082	25	56.584
Senegal	SEN	2021	50	46.8775	1.20092	18.5498	0.130928	1600.91	0.099	50	54.208
Senegal	SEN	2022		47.2092	1.08715	14.9954	0.120362	1568.77	0.124	64	52.909
Senegal	SEN	2023		44.3256	1.19205	16.7988	0.151621	1693.83	0.109	41	54.61
Senegal	SEN	2024					0.234413			41
Seychelles	SYC	2000	44	17.8883	3.78594	0	0.753243	7379.26			76.849
Seychelles	SYC	2001		17.0965	3.75857	0.255425		7355.01			80.019
Seychelles	SYC	2002		12.4822	3.63684	0.836145	0.753494	8123.29			82.93
Seychelles	SYC	2003		13.6938	4.14589	1.01304	0.740642	8107.72			84.029
Seychelles	SYC	2004		15.6416	3.81282	2.64844	0.277805	9520.37	1.372		80.005
Seychelles	SYC	2005	48	17.8611	3.62018	0.714542	0.337999	10296.1	1.165		76.345
Seychelles	SYC	2006		19.8163	3.44341	0.694344	0.336477	11246.3	0.83		79.392
Seychelles	SYC	2007		19.2358	3.04301	0.540462	0.338778	11299.8	0.995		78.407
Seychelles	SYC	2008		31.1579	2.40283	0.486551	0.340573	10450.8	0.757		73.331
Seychelles	SYC	2009		29.792	2.38705	0.429434	0.598283	9050.66	1.1		74.608
Seychelles	SYC	2010	59	22.1537	3.10602	2.30606	0.599472	10213	1.053		78.003
Seychelles	SYC	2011		23.1722	3.01366	7.57723	0.598773	10496.5	1.103		76.84
Seychelles	SYC	2012		18.8653	4.02018	1.77086	0.710415	10643.3	0.935		83.092
Seychelles	SYC	2013		19.0687	3.20525	3.15537	0.640428	13009.1			80.62
Seychelles	SYC	2014		27.4765	3.18385	0.467721	0.573046	13259			78.88
Seychelles	SYC	2015	73	26.0725	3.12092	0.352101	0.657577	13358.4			82.476
Seychelles	SYC	2016		25.307	3.25931	3.9172	0.813103	14282.3	1.849		80.477
Seychelles	SYC	2017	75	24.5994	3.26992	0.58811	0.618783	14901.8			83.777
Seychelles	SYC	2018		26.2068	3.1646	0.4118	0.650511	15510.5	2.087		80.22
Seychelles	SYC	2019	74	26.2749	3.0422	0	0.561851	15883.5	1.869		82.661
Seychelles	SYC	2020		21.5991	4.47689	0.339397	0.496541	11493.5		0	85.985
Seychelles	SYC	2021	75	26.9475	3.72146	0	0.561221	12092.2	3.634	0	85.931
Seychelles	SYC	2022		29.9648	2.99965	0	0.411075	16079.3	6.598		77.632
Seychelles	SYC	2023		27.9594	3.14971	0	0.529389	17095.6			79.512
Seychelles	SYC	2024					0.626767
Sierra Leone	SLE	2000	14	85.7263	0.560166	3.0359	-2.03212	333.941		235	24.79
Sierra Leone	SLE	2001		77.7734	0.653943	9.11335		369.993		56	36.831
Sierra Leone	SLE	2002		72.9952	0.685596	14.1065	-2.07481	401.408		3	36.867
Sierra Leone	SLE	2003		78.756	0.638372	8.03595	-2.0815	430.257		7	35.743
Sierra Leone	SLE	2004		72.8467	0.607426	15.004	-1.38972	439.764	0.031	8	38.669
Sierra Leone	SLE	2005	16	70.3477	0.592205	17.7954	-1.34	498.07		2	36.516
Sierra Leone	SLE	2006		67.1106	0.543493	22.124	-1.19663	559.214		1	42.78
Sierra Leone	SLE	2007		72.1995	0.441736	18.9441	-1.14047	600.148		4	40.931
Sierra Leone	SLE	2008		71.5979	0.456212	19.7171	-1.1736	664.504	0.0155	12	39.259
Sierra Leone	SLE	2009		65.3451	0.633432	24.0577	-1.18593	626.712		15	39.387
Sierra Leone	SLE	2010	27	56.2091	0.813568	28.9447	-1.14313	670.772	0.022	4	40.687
Sierra Leone	SLE	2011		60.2275	0.706011	28.6287	-1.1334	751.3	0.026	6	42.063
Sierra Leone	SLE	2012		67.6892	0.639431	21.01	-1.10257	877.101		7	42.416
Sierra Leone	SLE	2013		62.7791	0.588372	29.7886	-1.10864	1004.18		6	42.078
Sierra Leone	SLE	2014		35.0347	1.02696	52.789	-1.04814	949.846		9	43.307
Sierra Leone	SLE	2015	35	35.5975	0.810681	52.4598	-1.15148	958.242		12	41.13
Sierra Leone	SLE	2016		43.7061	0.663933	42.9473	-1.04414	837.676		9	42.359
Sierra Leone	SLE	2017	39	54.4961	0.543663	34.7572	-1.01682	788.923		18	40.825
Sierra Leone	SLE	2018		60.9889	0.491376	28.8713	-0.974586	845.915	0.075	69	38.088
Sierra Leone	SLE	2019	38	52.8898	0.776591	32.1877	-1.04392	843.713	0.033	68	39.797
Sierra Leone	SLE	2020		52.3404	0.828592	31.9086	-0.956981	845.314	0.073	42	41.044
Sierra Leone	SLE	2021	41	51.4098	1.148	25.6681	-1.01218	885.184		16	45.274
Sierra Leone	SLE	2022		54.9298	0.869992	26.6503	-0.958348	860.131	0.134	20	43.167
Sierra Leone	SLE	2023		54.4692	0.788924	28.504	-0.95449	757.858		43	40.853
Sierra Leone	SLE	2024					-0.967102			7
Somalia	SOM	2000	11				-2.03212			90	18.139
Somalia	SOM	2001								60
Somalia	SOM	2002					-1.91779			108
Somalia	SOM	2003					-2.19319			384
Somalia	SOM	2004					-1.92373			330
Somalia	SOM	2005	12				-2.02743			343	13.608
Somalia	SOM	2006					-2.02838		0.027	371
Somalia	SOM	2007					-2.02695			1242
Somalia	SOM	2008					-2.02067			1321
Somalia	SOM	2009					-1.91295			530
Somalia	SOM	2010	17				-2.08448			1085	11.236
Somalia	SOM	2011					-2.09106			1093
Somalia	SOM	2012					-2.06506			1819
Somalia	SOM	2013		38.2423	0.137042	56.8846	-2.09036	382.299		2782	20.626
Somalia	SOM	2014		39.5988	0.105486	56.0744	-2.20565	435.37	0.048	2639	20.396
Somalia	SOM	2015	21	37.5217	0.0990503	58.3193	-2.05097	480.019		2088	20.968
Somalia	SOM	2016		44.9874	0.107066	49.3774	-1.97666	515.097		2311	22.681
Somalia	SOM	2017	25	39.6851	0.136318	53.8997	-2.001	553.208		2626	22.605
Somalia	SOM	2018		43.2033	0.139006	50.3453	-2.03302	509.497		2901	22.162
Somalia	SOM	2019	26	44.9919	0.15007	47.823	-2.01119	539.892		2852	22.802
Somalia	SOM	2020		47.0698	0.230465	42.608	-1.9389	518.161		2782	23.86
Somalia	SOM	2021	27	41.5028	0.345547	44.9887	-1.96354	549.115		3047	24.703
Somalia	SOM	2022		40.7373	0.311913	47.448	-1.94569	573.141		3119	24.385
Somalia	SOM	2023		30.7795	0.530376	54.4063	-1.86535	597.485		3185	25.952
Somalia	SOM	2024					-1.95005			2828
South Africa	ZAF	2000	43	14.4615	2.6848	0.644959	0.472898	3217.85		44	68.288
South Africa	ZAF	2001		14.1263	2.40291	0.639608		2847.15		26	69.295
South Africa	ZAF	2002		13.5578	2.3057	0.64212	0.429122	2688.24		20	71.232
South Africa	ZAF	2003		12.3261	2.79077	5.5468	0.457386	4062.22		12	74.05
South Africa	ZAF	2004		11.8459	2.73156	5.45043	0.470165	5221.46	0.711	29	73.297
South Africa	ZAF	2005	51	11.3128	2.74503	11.7858	0.493241	5836.87		8	73.109
South Africa	ZAF	2006		10.5829	3.23012	6.4291	0.382498	6077.38		13	76.103
South Africa	ZAF	2007		9.70289	3.30013	7.29837	0.332165	6591.86	0.679	32	74.64
South Africa	ZAF	2008		8.84288	3.38494	8.06449	0.305117	6184.75	0.679	43	73.968
South Africa	ZAF	2009		8.10977	3.80475	8.09347	0.37626	6374.71	0.69	50	75.325
South Africa	ZAF	2010	63	7.99506	4.00033	7.64232	0.271979	7973.47	0.705	43	77.113
South Africa	ZAF	2011		7.75091	4.12051	7.09629	0.305197	8646.06	0.709	58	76.754
South Africa	ZAF	2012		7.72202	4.14035	6.63377	0.316295	8076.91	0.715	279	73.757
South Africa	ZAF	2013		7.61005	4.1451	6.74055	0.333489	7327.97	0.729	191	74.261
South Africa	ZAF	2014		5.66398	4.37357	1.73176	0.331414	6851.52	0.74	229	75.711
South Africa	ZAF	2015	70	5.73639	4.59632	1.67348	0.244485	6108.33	0.763	360	77.106
South Africa	ZAF	2016		5.78551	4.57297	2.04399	0.201316	5650.89	0.753	208	75.024
South Africa	ZAF	2017	71	5.83464	4.56554	1.08641	0.222772	6612.92	0.775	148	78.936
South Africa	ZAF	2018		5.84666	4.61023	1.13479	0.148105	6914.18	0.742	163	76.155
South Africa	ZAF	2019	71	5.74112	4.80006	1.12046	0.189381	6533.71	0.779	216	78.653
South Africa	ZAF	2020		6.42943	5.8451	1.73567	0.0953251	5580.6		266	77.09
South Africa	ZAF	2021	71	6.61018	5.49496	1.3519	0.0420935	6843.4	0.781	358	78.616
South Africa	ZAF	2022		6.71829	5.38312	1.90079	-0.0015597	6523.41	0.794	432	74.944
South Africa	ZAF	2023		6.69263	5.48957	2.05699	-0.18467	6022.54		405	74.132
South Africa	ZAF	2024					-0.225913			420
South Sudan	SSD	2000	18
South Sudan	SSD	2001
South Sudan	SSD	2002
South Sudan	SSD	2003
South Sudan	SSD	2004
South Sudan	SSD	2005	19
South Sudan	SSD	2006
South Sudan	SSD	2007
South Sudan	SSD	2008
South Sudan	SSD	2009
South Sudan	SSD	2010	23
South Sudan	SSD	2011					-1.57631			51
South Sudan	SSD	2012					-1.49427			187
South Sudan	SSD	2013					-1.6555			366
South Sudan	SSD	2014					-1.83011			868
South Sudan	SSD	2015	27				-1.98177			816	18.56
South Sudan	SSD	2016					-2.053			892
South Sudan	SSD	2017	30	19.1928	1.8668	68.1172	-2.13822	126.878		1086	25.118
South Sudan	SSD	2018		25.7004	1.18757	58.1727	-2.07651	266.116	0.041	782	26.816
South Sudan	SSD	2019	31	42.1926	0.992542	37.5417	-2.09482	388.058	0.033	520	29.588
South Sudan	SSD	2020		39.4795	0.70622	44.1896	-2.16309	506.916	0.043	850	27.32
South Sudan	SSD	2021	34	30.8626	0.929133	46.3104	-2.24259	552.088		1750	28.841
South Sudan	SSD	2022		31.7811	0.625611	50.5613	-2.21688	730.821	0.041	1724	26.884
South Sudan	SSD	2023		27.1448	0.501143	62.2982	-2.20602	626.664		1478	24.862
South Sudan	SSD	2024					-2.17285			1235
Sudan	SDN	2000	25	61.8227	1.21998		-1.11412	388.017	0.158	212	27.485
Sudan	SDN	2001		62.2807	1.12152			451.283		198	27.747
Sudan	SDN	2002		61.4213	1.12865		-1.34176	506.259		321	27.158
Sudan	SDN	2003		62.5605	1.26332	1.47527	-1.54827	580.312		202	39.39
Sudan	SDN	2004		57.1779	1.57303	1.40056	-1.28748	705.113	0.247	542	41.31
Sudan	SDN	2005	27	54.6309	1.59964	2.67883	-1.44776	905.551		307	40.188
Sudan	SDN	2006		55.7893	1.77736	4.53977	-1.16964	1132.48	0.346	193	45.534
Sudan	SDN	2007		58.0018	2.04945	2.68199	-1.17619	1444.37	0.346	130	47.673
Sudan	SDN	2008		62.403	1.73195	2.47653	-1.3101	1527.58	0.322	288	44.037
Sudan	SDN	2009		52.4758	2.62936	3.65839	-1.22613	1251.05		320	47.588
Sudan	SDN	2010	36	61.3134	1.64627	3.01769	-1.31839	1455.17		257	43.248
Sudan	SDN	2011		65.9314	1.28282	7.92096	-1.3213	1431.18		278	40.85
Sudan	SDN	2012		65.4547	1.49337	4.28994	-1.31596	1325.67		571	40.643
Sudan	SDN	2013		74.8343	1.15195	5.01029	-1.31137	1399.78		848	37.193
Sudan	SDN	2014		67.0318	1.43454	3.69378	-1.30934	1564.16		1077	39.662
Sudan	SDN	2015	43	79.4011	0.824857	2.02047	-1.29343	1612.37	0.396	1188	37.998
Sudan	SDN	2016		71.1859	1.28979	1.96162	-1.27258	1572.67		1190	38.843
Sudan	SDN	2017	45	72.5464	1.06663	5.38007	-1.24183	1144.96	0.25	594	39.935
Sudan	SDN	2018		66.9534	1.03875	6.4059	-1.49191	759.429		502	36.315
Sudan	SDN	2019	45	67.5037	1.03736	6.55648	-1.4192	691.224		461	38.779
Sudan	SDN	2020		52.9636	1.04006	6.89716	-1.42933	753.101		435	39.591
Sudan	SDN	2021	44	58.2451	0.773209	10.0291	-1.4426	731.106		683	38.369
Sudan	SDN	2022		42.5096	0.825832	31.5901	-1.53603	678.711		909	33.633
Sudan	SDN	2023		57.3663	0.591547	16.3103	-1.77261	739.327		4886	29.182
Sudan	SDN	2024					-1.79394			5971
Togo	TGO	2000	19	81.6185	0.290969	3.31918	-1.35773	391.515		1	37.153
Togo	TGO	2001		80.5286	0.325033	3.7755		378.907	0.057	0	45.936
Togo	TGO	2002		79.7188	0.341176	4.19117	-1.64907	425.29		0	41.73
Togo	TGO	2003		78.0413	0.376852	4.93229	-1.65576	514.042		2	40.477
Togo	TGO	2004		75.1605	0.444114	6.16767	-1.55167	535.142	0.043	0	43.718
Togo	TGO	2005	25	74.85	0.503626	6.59502	-1.71073	526.563		13	35.639
Togo	TGO	2006		73.6461	0.564458	7.40891	-1.58058	527.763		1	42.541
Togo	TGO	2007		67.0038	0.59499	9.97921	-1.55337	607.588	0.047	0	45.331
Togo	TGO	2008		66.3461	0.600183	10.8406	-1.5008	718.948	0.055	1	44.775
Togo	TGO	2009		65.3848	0.68257	10.6649	-1.44723	720.694		1	45.486
Togo	TGO	2010	30	62.27	1.12349	5.86107	-1.35577	704.987	0.0506	1	45.913
Togo	TGO	2011		62.147	1.03214	8.38732	-1.35391	783.989		1	48.232
Togo	TGO	2012		59.249	1.16668	10.1815	-1.22582	762.392		2	48.54
Togo	TGO	2013		57.8695	0.960691	16.3987	-1.25801	826.543		7	45.206
Togo	TGO	2014		57.3048	0.998287	14.9839	-1.08818	855.585		2	48.553
Togo	TGO	2015	40	66.9626	0.92439	12.0773	-1.08848	751.052	0.047	2	46.43
Togo	TGO	2016		63.4019	0.975354	15.2823	-0.95797	772.581	0.044	4	46.542
Togo	TGO	2017	43	61.4657	1.04959	15.016	-0.983284	792.766	0.072	14	45.736
Togo	TGO	2018		64.664	1.03169	9.50871	-0.940524	851.134	0.074	3	48.486
Togo	TGO	2019	41	66.2098	0.89146	9.11538	-0.832004	826.255	0.074	14	45.97
Togo	TGO	2020		64.3251	0.912464	15.0885	-0.8829	852.314	0.079	32	43.318
Togo	TGO	2021	44	69.0046	0.557937	16.1766	-0.877013	938.689	0.057	12	44.557
Togo	TGO	2022		64.1665	0.665351	20.6405	-0.968439	894.023	0.08	35	41.116
Togo	TGO	2023		64.3412	0.680568	19.968	-0.917685	975.805		27	42.282
Togo	TGO	2024					-0.801459			33
Uganda	UGA	2000	22	43.0313	1.26869	31.4671	-0.543403	323.17		233	36.564
Uganda	UGA	2001		43.3907	1.3501	29.3303		316.618		109	39.945
Uganda	UGA	2002		44.0121	1.46629	24.1337	-0.4744	329.977	0.047	455	40.78
Uganda	UGA	2003		45.4187	1.47304	18.6367	-0.653539	331.08		651	40.115
Uganda	UGA	2004		38.378	1.36709	30.7165	-0.547557	395.877	0.081	325	41.14
Uganda	UGA	2005	28	48.5991	1.03256	31.9874	-0.610698	445.607	0.12	261	36.766
Uganda	UGA	2006		54.0534	0.980675	29.2524	-0.512881	488.962		266	38.574
Uganda	UGA	2007		54.4839	1.03116	27.0408	-0.450149	590.557		75	42.419
Uganda	UGA	2008		52.7421	0.938717	28.4551	-0.534875	734.096		66	42.767
Uganda	UGA	2009		42.8492	0.826819	41.4914	-0.485208	766.475		73	41.907
Uganda	UGA	2010	36	37.3907	1.09722	45.1381	-0.448098	762.028		87	42.214
Uganda	UGA	2011		33.01	0.908633	50.1887	-0.477397	824.498		62	42.829
Uganda	UGA	2012		37.5123	0.92485	46.0136	-0.512413	901.02	0.098	35	44.037
Uganda	UGA	2013		42.5178	0.974321	37.4314	-0.477116	914.935		33	45.312
Uganda	UGA	2014		40.1464	0.950771	35.9745	-0.307365	954.886		66	45.726
Uganda	UGA	2015	43	39.4709	0.757137	42.925	-0.304915	802.542	0.097	85	43.889
Uganda	UGA	2016		40.6096	0.786367	41.2619	-0.378526	779.204		102	42.258
Uganda	UGA	2017	46	38.0895	0.638658	43.1404	-0.364528	786.245	0.172	107	43.818
Uganda	UGA	2018		35.6289	0.674599	43.5128	-0.496372	819.378		207	40.734
Uganda	UGA	2019	48	38.2603	0.573441	42.0198	-0.516967	879.567		221	42.778
Uganda	UGA	2020		29.9384	1.19108	46.0002	-0.57654	853.918	0.158	444	40.915
Uganda	UGA	2021	49	27.3558	1.14727	50.0215	-0.568751	932.356		611	42.926
Uganda	UGA	2022		33.8402	0.983589	42.0029	-0.514972	999.23	0.191	430	41.341
Uganda	UGA	2023		32.1718	0.923391	44.0699	-0.431579	1067.36		369	42.011
Uganda	UGA	2024					-0.350136			285
United Republic of Tanzania	TZA	2000	20	38.4702	0.745864	37.63	-0.813919	361.032		14	38.333
United Republic of Tanzania	TZA	2001		40.9083	1.08908	31.5769		358.256		21	43.377
United Republic of Tanzania	TZA	2002		42.5196	1.33213	27.407	-0.680363	363.304	0.023	16	45.642
United Republic of Tanzania	TZA	2003		40.0127	1.49159	27.043	-0.776861	381.752		3	49.076
United Republic of Tanzania	TZA	2004		37.3713	1.96675	27.0313	-0.713761	408.715		26	47.67
United Republic of Tanzania	TZA	2005	23	33.7146	2.31117	28.5668	-0.536735	438.313		43	44.775
United Republic of Tanzania	TZA	2006		25.7719	2.37999	42.028	-0.424964	468.496		8	51.838
United Republic of Tanzania	TZA	2007		28.4742	1.94106	42.4092	-0.409503	526.36		6	51.057
United Republic of Tanzania	TZA	2008		32.5851	2.25784	25.7731	-0.51647	652.538		13	53.392
United Republic of Tanzania	TZA	2009		34.6483	1.48485	34.9848	-0.460575	671.518		5	51.089
United Republic of Tanzania	TZA	2010	33	31.894	1.44998	39.4191	-0.452924	711.82		3	49.156
United Republic of Tanzania	TZA	2011		27.9546	1.28682	44.9126	-0.492137	746.675		27	47.069
United Republic of Tanzania	TZA	2012		24.6903	1.17573	48.3328	-0.601317	836.952	0.031	56	45.188
United Republic of Tanzania	TZA	2013		24.0905	1.18517	48.4867	-0.572305	935.542		49	46.058
United Republic of Tanzania	TZA	2014		25.9815	1.19945	43.5694	-0.482365	992.661	0.06	39	47.827
United Republic of Tanzania	TZA	2015	38	25.8291	1.25726	37.8433	-0.387003	911.632		37	48.468
United Republic of Tanzania	TZA	2016		21.8936	1.61014	36.4149	-0.351564	924.755		20	52.851
United Republic of Tanzania	TZA	2017	40	21.2647	1.55679	39.2534	-0.357548	970.3		74	49.268
United Republic of Tanzania	TZA	2018		20.7937	1.62666	40.8523	-0.465966	953.651	0.05	38	50.513
United Republic of Tanzania	TZA	2019	42	21.8217	1.63128	36.8278	-0.509872	993.614		33	50.935
United Republic of Tanzania	TZA	2020		29.0339	0.861594	41.6473	-0.488376	1039.37		49	46.471
United Republic of Tanzania	TZA	2021	43	25.4418	0.944978	46.3825	-0.486841	1081.71		49	47.029
United Republic of Tanzania	TZA	2022		27.9663	0.981858	39.6805	-0.42725	1146.2	0.134	47	48.105
United Republic of Tanzania	TZA	2023		27.9313	0.966641	39.3623	-0.405131	1187.94		59	47.941
United Republic of Tanzania	TZA	2024					-0.292451			81
Zambia	ZMB	2000	28	45.5124	1.47394	6.2957	-1.35181	359.429		15	43.75
Zambia	ZMB	2001		38.813	1.92503	10.2334		396.555		11	53.617
Zambia	ZMB	2002		28.4399	1.89819	30.9484	-1.06354	393.864		3	50.262
Zambia	ZMB	2003		28.4194	1.45377	37.989	-1.21116	446.292		10	45.394
Zambia	ZMB	2004		31.0702	1.31544	34.6932	-1.02411	548.688	0.132	8	47.206
Zambia	ZMB	2005	34	26.0979	1.24336	45.7445	-0.922213	710.737	0.055	12	44.841
Zambia	ZMB	2006		25.6958	1.32859	40.2622	-0.962111	1052.13	0.054	22	47.767
Zambia	ZMB	2007		24.8317	1.48783	33.7831	-0.889134	1118.97		25	50.045
Zambia	ZMB	2008		20.4129	1.58524	38.0975	-0.807775	1375.77	0.061	4	54.499
Zambia	ZMB	2009		14.6893	1.66772	49.6874	-0.701067	1136.48	0.059	9	51.975
Zambia	ZMB	2010	45	14.2335	1.5598	45.2373	-0.719346	1450.99	0.06	9	53.402
Zambia	ZMB	2011		12.1916	1.57353	45.9864	-0.510903	1624.55		17	54.015
Zambia	ZMB	2012		12.6316	1.54222	46.4137	-0.500282	1709.99		22	53.507
Zambia	ZMB	2013		11.7091	1.30987	56.1455	-0.53123	1821.06		40	49.988
Zambia	ZMB	2014		13.8197	1.89382	32.5483	-0.446243	1707.72		45	56.027
Zambia	ZMB	2015	52	12.2553	2.09054	36.4042	-0.529713	1295.51		47	55.965
Zambia	ZMB	2016		12.1395	1.71431	42.5711	-0.528617	1239.48	0.09	52	52.063
Zambia	ZMB	2017	53	10.6558	2.51039	31.5825	-0.463276	1483.47		14	60.812
Zambia	ZMB	2018		10.2759	2.08801	44.1087	-0.501992	1463.9	0.224	29	54.807
Zambia	ZMB	2019	54	7.25238	2.25831	57.9878	-0.619718	1258.99	0.237	22	54.445
Zambia	ZMB	2020		8.11366	3.59365	33.0034	-0.734349	951.645	0.253	80	56.889
Zambia	ZMB	2021	56	7.07829	2.82307	49.4619	-0.726671	1127.16	0.295	75	54.951
Zambia	ZMB	2022		8.91543	2.50694	41.774	-0.589942	1447.12	0.324	38	55.642
Zambia	ZMB	2023		10.2868	2.43413	47.9081	-0.562821	1330.73		37	53.793
Zambia	ZMB	2024					-0.533056			10
Zimbabwe	ZWE	2000	30				-0.777713		0.126	270	36.358
Zimbabwe	ZWE	2001								280
Zimbabwe	ZWE	2002					-0.85158			656
Zimbabwe	ZWE	2003					-0.947738			254
Zimbabwe	ZWE	2004					-0.967245		0.169	242
Zimbabwe	ZWE	2005	31				-1.28713		0.121	200	32.945
Zimbabwe	ZWE	2006					-1.42714			91
Zimbabwe	ZWE	2007					-1.34017		0.0544	159
Zimbabwe	ZWE	2008					-1.58722		0.0596	700
Zimbabwe	ZWE	2009					-1.55384		0.115	147
Zimbabwe	ZWE	2010	46	34.431	2.75333	27.4764	-1.46549	901.588	0.121	127	47.217
Zimbabwe	ZWE	2011		37.2208	2.11965	19.2078	-1.37357	1037.26	0.078	196	45.677
Zimbabwe	ZWE	2012		34.9685	1.99879	15.3354	-1.35761	1238.61	0.077	126	48.151
Zimbabwe	ZWE	2013		29.756	2.01809	20.1259	-1.2975	1362.28	0.08	65	50.095
Zimbabwe	ZWE	2014		24.8318	2.73156	20.2239	-1.20095	1372.25	0.119	97	52.591
Zimbabwe	ZWE	2015	56	25.7864	1.55136	24.2562	-0.94128	1386.42	0.174	153	52.099
Zimbabwe	ZWE	2016		24.6491	1.37225	29.5112	-0.913541	1407.45	0.172	105	48.633
Zimbabwe	ZWE	2017	57	10.5484	1.55098	37.1451	-0.958433	1487.93	0.179	208	52.226
Zimbabwe	ZWE	2018		8.79635	1.59527	29.7745	-1.04731	2455.84	0.201	238	51.913
Zimbabwe	ZWE	2019	55	9.08337	0.461152	61.935	-1.10496	1704.69	0.123	98	46.171
Zimbabwe	ZWE	2020		10.4083	0.652689	55.6746	-1.12528	1731.06	0.128	93	43.996
Zimbabwe	ZWE	2021	55	8.88617	0.879811	46.9617	-1.0995	2279.9	0.136	85	50.893
Zimbabwe	ZWE	2022		8.72435	1.0183	51.2298	-1.09976	2029.55	0.127	142	46.032
Zimbabwe	ZWE	2023		10.6348	0.946628	44.9842	-0.98848	2150.69	0.136	173	47.164
Zimbabwe	ZWE	2024					-0.98763			53

## Sheet: Metadata
Workbook title	Curated SSA country-year panel for Bayesian State-Space Modelling of UHC as a Health Security Index
Panel unit	Sub-Saharan African country-year
Panel period	2000-2024
Countries included	49
Rows in SSA_Panel	1225
Main structure	country, iso3, year, uhc_sci, oop_che, gghe_gdp, external_che, gov_effectiveness, gdp_pc, physicians_1000, conflict_events, latent_hsi
Note on latent_hsi	Initial normalized proxy only; replace with Bayesian posterior latent state after estimating the state-space model. Computed where at least three components are available.
Note on physicians_1000	Updated from World Bank WDI indicator SH.MED.PHYS.ZS using uploaded file P_Data_Extract_From_World_Development_Indicators (2).xlsx. Raw observed values are used; 2024 and unavailable country-years remain blank. Non-missing physician observations: 561.
Variable	Source / treatment
uhc_sci	WHO UHC Service Coverage Index, 9A706FD_ALL_LATEST.csv
oop_che	WHO GHED: oops_che; out-of-pocket spending as % of current health expenditure
gghe_gdp	WHO GHED: gghed_gdp; domestic general government health expenditure as % of GDP
external_che	WHO GHED: ext_che; external health expenditure as % of current health expenditure
gov_effectiveness	World Bank WGI Data360: GOV_WGI_GE, WGI_EST metric (-2.5 to +2.5 estimate)
gdp_pc	WHO GHED: gdp_pc_usd
conflict_events	ACLED uploaded country-year political violence events file
latent_hsi	Min-max average proxy using UHC(+), GGHE_GDP(+), governance(+), log GDPpc(+), OOP(-), external health expenditure(-), and log conflict events(-).
Physicians update file	P_Data_Extract_From_World_Development_Indicators (2).xlsx
Physicians indicator	SH.MED.PHYS.ZS — Physicians (per 1,000 people)
Physicians non-missing observations	561

## Sheet: Coverage_Summary
variable	non_missing_observations	share_of_panel_percent
uhc_sci	343	28
oop_che	1136	92.73
gghe_gdp	1136	92.73
external_che	1133	92.49
gov_effectiveness	1165	95.1
gdp_pc	1136	92.73
physicians_1000	561	45.8
conflict_events	1084	88.49
latent_hsi	1142	93.22
